1 Unoccupied aerial system enabled functional modeling of maize (*Zea mays* L.) height reveals  
2 dynamic expression of loci associated to temporal growth.

3  
4 Steven L. Anderson II<sup>1,#a</sup>, Seth C. Murray<sup>1,\*</sup>, Yuanyuan Chen<sup>1,#b</sup>, Lonesome Malambo<sup>2</sup>, Anjin  
5 Chang<sup>3</sup>, Sorin Popescu<sup>2</sup>, Dale Cope<sup>4</sup>, and Jinha Jung<sup>3,#c</sup>

6  
7 <sup>1</sup>Department of Soil and Crop Sciences, Texas A&M University, College Station, TX 77843.

8  
9 <sup>2</sup>Department of Ecosystem Science and Management, Texas A&M University, College Station,  
10 TX, 77843.

11  
12 <sup>3</sup>School of Engineering and Computer Sciences, Texas A&M University - Corpus Christi, Corpus  
13 Christi, TX 78412

14  
15 <sup>4</sup>Department of Mechanical Engineering, Texas A&M University, College Station, TX 77843.

16  
17 <sup>#a</sup>Current Address: Department of Environmental Horticulture, University of Florida, Institute of  
18 Food and 12 Agricultural Sciences, Mid-Florida Research and Education Center, Apopka, FL  
19 32703.

20  
21 <sup>#b</sup>Current Address: National Key Laboratory of Crop Genetic Improvement, Huazhong  
22 Agricultural University, Hongshan District, Wuhan, 430070, China.

23  
24 <sup>#c</sup>Current Address: Department of Civil Engineering, Purdue University, West Lafayette, IN  
25 47907.

26  
27  
28 \*Corresponding Author

29 Email: [sethmurray@tamu.edu](mailto:sethmurray@tamu.edu)

30  
31 Conflicts of interest

32 The authors declare no conflict of interest associated with the work described in this manuscript.

### 33 **Abstract**

34 Unoccupied aerial systems (UAS) were used to phenotype growth trajectories of inbred  
35 maize populations under field conditions. Three recombinant inbred line populations were  
36 surveyed on a weekly basis collecting RGB images across two irrigation regimens (irrigated and  
37 non-irrigated/rain fed). Plant height, estimated by the 95<sup>th</sup> percentile (P95) height from UAS  
38 generated 3D point clouds, exceeded 70% correlation to manual ground truth measurements and  
39 51% of experimental variance was explained by genetics. The Weibull sigmoidal function  
40 accurately modeled plant growth ( $R^2$ : >99%; RMSE: < 4 cm) from P95 genetic means. The mean  
41 asymptote was strongly correlated ( $r^2=0.66-0.77$ ) with terminal plant height. Maximum absolute  
42 growth rates ( $\text{mm d}^{-1}$ ) were weakly correlated to height and flowering time. The average inflection  
43 point ranged from 57 to 60 days after sowing (DAS) and was correlated with flowering time  
44 ( $r^2=0.45-0.68$ ). Functional growth parameters (asymptote, inflection point, growth rate) alone  
45 identified 34 genetic loci, each explaining 3 to 15% of total genetic variation. Plant height was  
46 estimated at one-day intervals to 85 DAS, identifying 58 unique temporal quantitative trait loci  
47 (QTL) locations. Genomic hotspots on chromosome 1 and 3 indicated chromosomal regions  
48 associated with functional growth trajectories influencing flowering time, growth rate, and  
49 terminal growth. Temporal QTL demonstrated unique dynamic expression patterns not observable  
50 previously, no QTL were significantly expressed throughout the entire growing season. UAS  
51 technologies improved phenotypic selection accuracy and permitted monitoring traits on a  
52 temporal scale previously infeasible using manual measurements, furthering understanding of crop  
53 development and biological trajectories.

54

## 55 **Author summary**

56 Unoccupied aerial systems (UAS) now can provide high throughput phenotyping to  
57 functionally model plant growth and explore genetic loci underlying temporal expression of  
58 dynamic phenotypes, specifically plant height. Efficient integration of temporal phenotyping via  
59 UAS, will improve the scientific understanding of dynamic, quantitative traits and developmental  
60 trajectories of important agronomic crops, leading to new understanding of plant biology. Here we  
61 present, for the first time, the dynamic nature of quantitative trait loci (QTL) over time under field  
62 conditions. To our knowledge, this is first empirical study to expand beyond selective  
63 developmental time points, evaluating functional and temporal QTL expression in maize (*Zea*  
64 *mays* L.) throughout a growing season within a field-based environment.

## 65 **Introduction**

66 Phenotypic characterization of agricultural plant populations has lagged in scale, density,  
67 and accuracy when compared with genomic data [1]. Due to resource demands of labor and time-  
68 sensitive components in conventional phenotyping, most manually measured traits are acquired at  
69 only one time point in the growing season and constrained in the number of samples. This creates  
70 a limited scope of biological understanding when associating genomic information with the  
71 underlying traits of interest through plant development [2]. Advances in technologies including  
72 computer vision, robotics, remote sensing, and unoccupied vehicles have facilitated the  
73 development of high-throughput phenotyping (HTP) platforms which can minimize phenotypic  
74 bottlenecks [3, 4].

75 Implementation of HTP systems provides the ability to collect temporal phenotypic  
76 measurements on large representative populations within field settings, to understand how

77 individuals interact with their environments [3, 5, 6]. Unoccupied aerial systems (UAS) are  
78 especially useful to increase the size of populations and field studies investigated, collecting RGB  
79 images, and reconstructing three dimensional representations of field crop trials using structure  
80 from motion methodology [6-15]. UAS height estimates of maize have previously been validated  
81 using correlations to traditional manual measurements and evidence of equivalent or greater  
82 phenotypic variation partitioned to genetic factors [7, 9, 15, 16]. To our knowledge the majority  
83 of reported field based phenotyping of maize with HTP platforms has focused on hybrid trials [6-  
84 9, 15, 17-19] but, limited reports have been published on the evaluation of inbred trials [20-22],  
85 specifically genetic mapping populations. Inbred lines in maize are substantially shorter and have  
86 less biomass than hybrids, lacking heterosis.

87         Maize height is important as a physiological and a highly heritable agronomic trait [23-26]  
88 commonly collected due to its ease of measurement, agronomic importance, and correlation to  
89 hybrid grain yield in some environment and management scenarios [15, 27-32]. Manually  
90 measured plant height is commonly collected after reproductive maturity as the distance from the  
91 ground to the tip of the tassel, flag leaf, or peduncle. The genetic architecture of plant height in  
92 maize has been determined to fit an infinitesimal model (i.e. very large numbers of small additive  
93 effect loci) with some large effect loci likely fixed during domestication and early selection [23].  
94 Functional genetic variation in terminal plant height has been shown to be controlled through  
95 hormones; mutations within the (i) gibberellin biosynthesis pathways [33] and crosstalk with other  
96 phytohormones including: (ii) auxin [34] and (iii) brassinosteroids [35-38]. Hormones are well  
97 known to fluctuate throughout plant growth, responding to environmental and developmental  
98 stimuli [39-42]. Traditional QTL studies using phenotypic data at a single terminal (end of season)  
99 time point can only represent accumulated effects, ignoring the dynamic nature of many

100 agronomically important traits which, like hormones, change and can be identified as functions of  
101 time [43]. To our knowledge, Wang, Zhang (20) is the only reported field based temporal  
102 association study in maize using UAS.

103 Plant height is an ideal phenotype to explore the temporal patterns of QTL expression in  
104 maize. Using UAS, we evaluated three recombinant inbred line (RIL) linkage mapping populations  
105 under field conditions and captured the dynamic growth patterns of plant height across these maize  
106 inbreds. The objectives of this study were to: (i) evaluate UAS procedures developed for hybrids  
107 to estimate heights within inbred maize populations; (ii) model and compare growth patterns across  
108 genetic populations; (iii) evaluate temporal patterns of QTL expression through the growing  
109 season, and (iv) evaluate the temporal expression patterns for previously reported QTL.

## 110 **Results and Discussion**

### 111 **UAS surveys and image processing quality**

112 A total of 18 and 11 flights were conducted over the bi-parental mapping populations using  
113 the DJI Phantom 3 Pro and Tuffwing UAV Mapper, respectively (S1 Table). Early season DJI  
114 Phantom 3 Pro data collection prior to 35 DAS resulted in limited to no plant structure  
115 reconstructed within the 3D point clouds, indicating that higher resolution imaging would be  
116 necessary to reconstruct early season plant structure. Out of 29 flights, 16 were observed to be of  
117 high quality while only eight flight dates (35, 43, 57, 62, 65, 69, 100, and 117 DAS) conformed  
118 to statistical quality tests (S1 File) and were used for the remainder of this study (Fig 1; S2 Table).

119

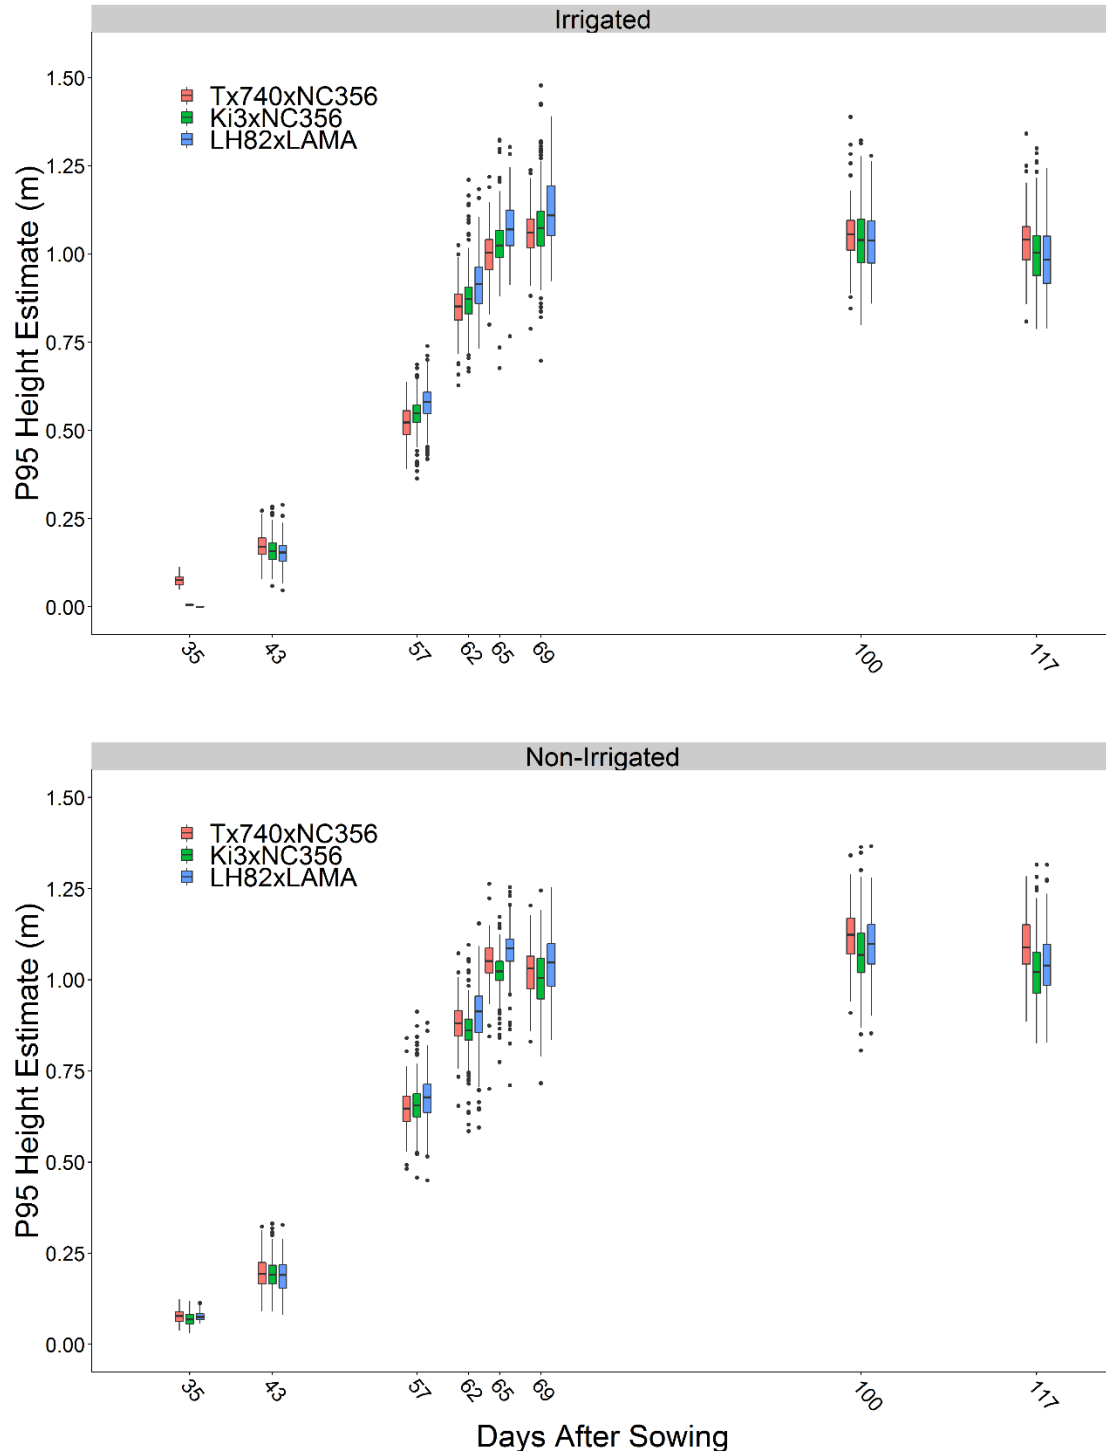

120

121 **Fig 1. UAS P95 height estimates summarized by flight date.** Although the three populations  
122 were genetically diverse, the mean growth patterns behaved similarly. Little differentiation could  
123 be seen early in the season between genotypes, where the measurement error may have been  
124 smaller than genotypic differences, as the plants reached their peak height and flowered, height  
125 differences became much greater.

## 126 Genetic variance decomposition

127 Variance component decomposition demonstrated total phenotypic variance increased  
 128 throughout the growing season for all inbred populations (Fig 2, black circles), as has been found  
 129 in hybrid trials [7, 15]. UAS phenotypic variance for height did not exceed manual, terminal  
 130 plant height (PHT<sub>TRML</sub>, Fig 2 M bar). Genetic variance averaged 51% (excluding 35 DAS) over  
 131 the season fluctuating from flight to flight, but generally increasing until reaching a terminal  
 132 height plateau. The proportion of variance attributed to genetics of

133

134

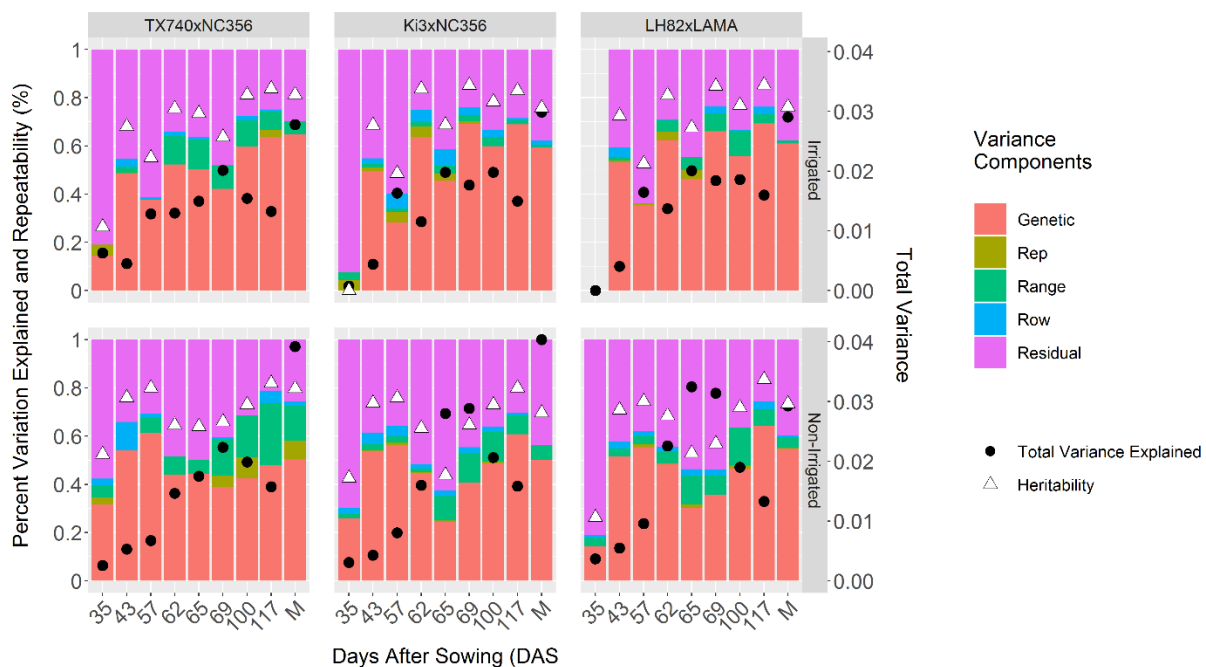

135

136 **Fig 2. Variance component decomposition of UAS P95 height estimates.** The percent variation  
 137 explained in the model of Eq. 1 for individual UAS surveys of three RIL populations showed that  
 138 genetic and residual (error) variation, were the main drivers of variability observed. Total variance  
 139 (black circles) increased as the plants grew over later flight dates and was higher for manual (M)  
 140 than UAS measurements. That the percent variance measures and heritability were similar for M  
 141 and UAS suggests that UAS compressed all variance sources similarly

142

143

144 plant height ( $PHT_{TRML}$ ), as measured from the ground to the tip of the tassel, were numerically  
145 greater (irrigated:  $62 \pm 3\%$ ; non-irrigated:  $52 \pm 3$ ), but not statistically ( $\alpha=0.05$ ) different from  
146 across UAS genetic variance.

### 147 **Sigmoidal modeling of UAS height estimates**

148 The Weibull function, a sigmoidal growth function, modeled maize inbred temporal growth  
149 (mean  $R^2 > 0.99$ , RMSE ranging from 2.4 to 3.7 cm) across all populations and environment (Fig  
150 3). Significant differences in asymptote, the maximum height, were only found between  
151 Tx740xNC356 (1.10 m) and LH82xLAMA (1.08 m) with a 2 cm difference in means under  
152 irrigation. LH82 [44] is the earliest to flower and shortest of the inbred lines adaptable to these  
153 environments and had among the lowest asymptote and inflection point, but moderate growth rate.

154 In comparison,  $PHT_{TRML}$  was significantly different across populations (1.66, 1.59, and  
155 1.57 m) under irrigated conditions for Tx740xNC356, Ki3xNC356, and LH82xLAMA,  
156 respectively. The reduced means of the asymptote demonstrate the inherent biases of UAS  
157 estimation of plant height compared with manual measurements [8, 12, 13, 15];  $\sim 0.5$  m  
158 underestimate of height has been documented in past studies of hybrid maize at flight altitudes of  
159 120 m [15]. The average difference in height estimates increased by  $\sim 5$  and  $\sim 10$  cm when  
160 compared to P99 and P100 point cloud estimates, indicating that the reduction was not caused  
161 solely by the lower percentile, P95. The combination of flight altitude and reduced plant canopy  
162 density of the inbreds likely biased the UAS towards shorter estimates. Biases aside, numerical  
163 rankings between asymptote and  $PHT_{TRML}$  were correctly consistent in ranking Tx740xNC356,  
164 Ki3xNC356, and LH82xLAMA population means from tallest to shortest and Pearson correlations  
165 ( $r$ ) (Irrigated: 0.77, 0.74, and 0.74; Non-Irrigated: 0.66, 0.72, and 0.74; S1-S3 Fig)



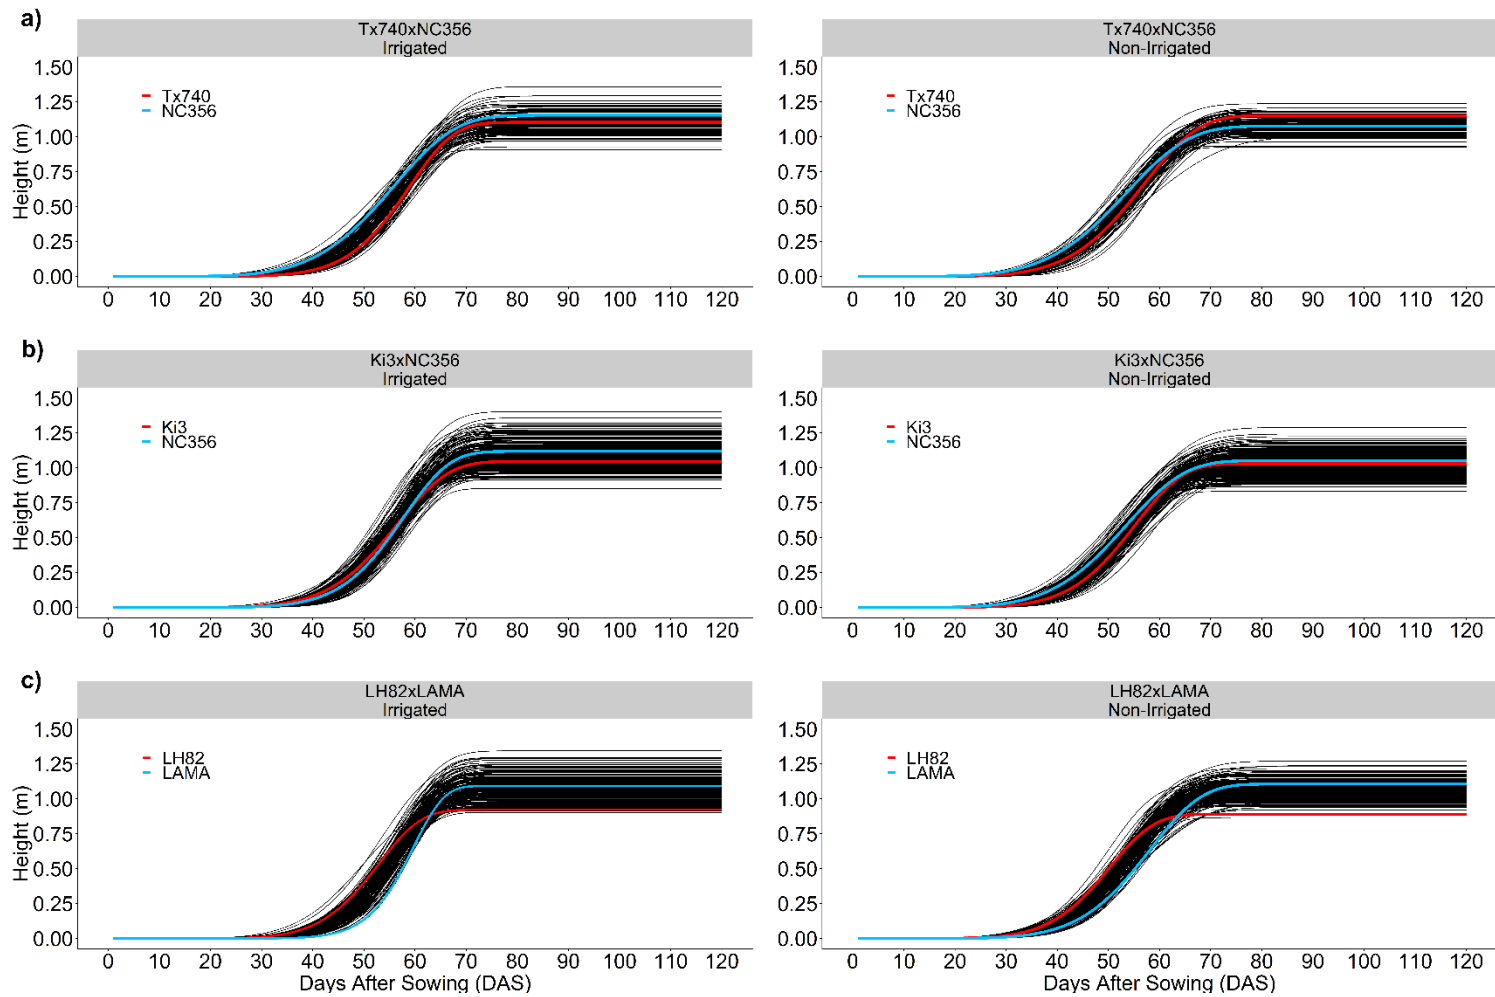

166

167 **Fig 3. Nonlinear Weibull functional modeling of growth trajectories.** Sigmoidal curves based off the Weibull function (Eq. [3])  
 168 effectively modeled the growth of each entry. For each population the female parent (red line) and the male parent (blue line) crossed  
 169 over demonstrating that early season height was not predictable by standard manual terminal height measurements.

170 indicated highly significant ( $\alpha=0.05$ ), positive linear correlations between UAS asymptotes  
171 estimates and  $PHT_{TRML}$  measurements.

172         The inflection point of the Weibull model is biologically important to identify the DAS in  
173 which maximum AGR is occurring; this point has been shown to be highly correlated to flowering  
174 time in hybrid trials [15]. Significant differences were found between each population's mean for  
175 inflection point (58.6, 58.0, and 57.5 d for Tx740xNC356, Ki3xNC356, and LH82xLAMA) within  
176 the irrigated trial (Fig 4c). Abiotic stress related to water limitations in non-irrigated trials delayed  
177 the inflection point by two days on average across the populations. Inflection point had low  
178 positive correlations to  $PHT_{TRML}$  (Irrigated: 0.30, 0.27, and 0.34; Non-Irrigated: 0.02, 0.22, and  
179 0.24; S1-S3 Fig) but high correlations to flowering time (DTA/DTS) (Irrigated: 0.60/0.45,  
180 0.59/0.58, and 0.64/0.59; Non-Irrigated: 0.61/0.56, 0.55/0.53, and 0.68/0.66; S1-S3 Fig).  $PHT_{P95}$   
181 estimates were negatively correlated ( $r=-0.74$ :-0.50) to inflection points during the early season  
182 but gradually progressed toward a positive correlation  $\sim 10$  days after the mean inflection point  
183 (S1-S3 Fig). Later inflection points had extended vegetative growth periods leading to taller plants,  
184 indicating the possibility of pleiotropic QTL for both flowering time and growth rate across the  
185 functional curve parameters. Because correlation was high but imperfect, tall genotypes with  
186 earlier inflection points could indicate better fitness in stressful environments, as these plants reach  
187 their terminal height quickly without regard to environmental stresses.

188         The growth rate parameter, influencing the steepness of the Weibull curve, significantly differed  
189 ( $\alpha=0.05$ ) in its means across the populations in both environments (Irrigated: 6.9, 7.6, and 8.2;  
190 Non-irrigated: 6.3, 6.5, and 6.8). The first derivative of the Weibull function (Eq. 4), the absolute  
191 growth rate (AGR), calculated at the inflection point ( $x=x_0$ ) equals the maximum AGR. The  
192 maximum AGR occurred  $\sim 50$ -60 DAS, which was shortly before flowering, in this period

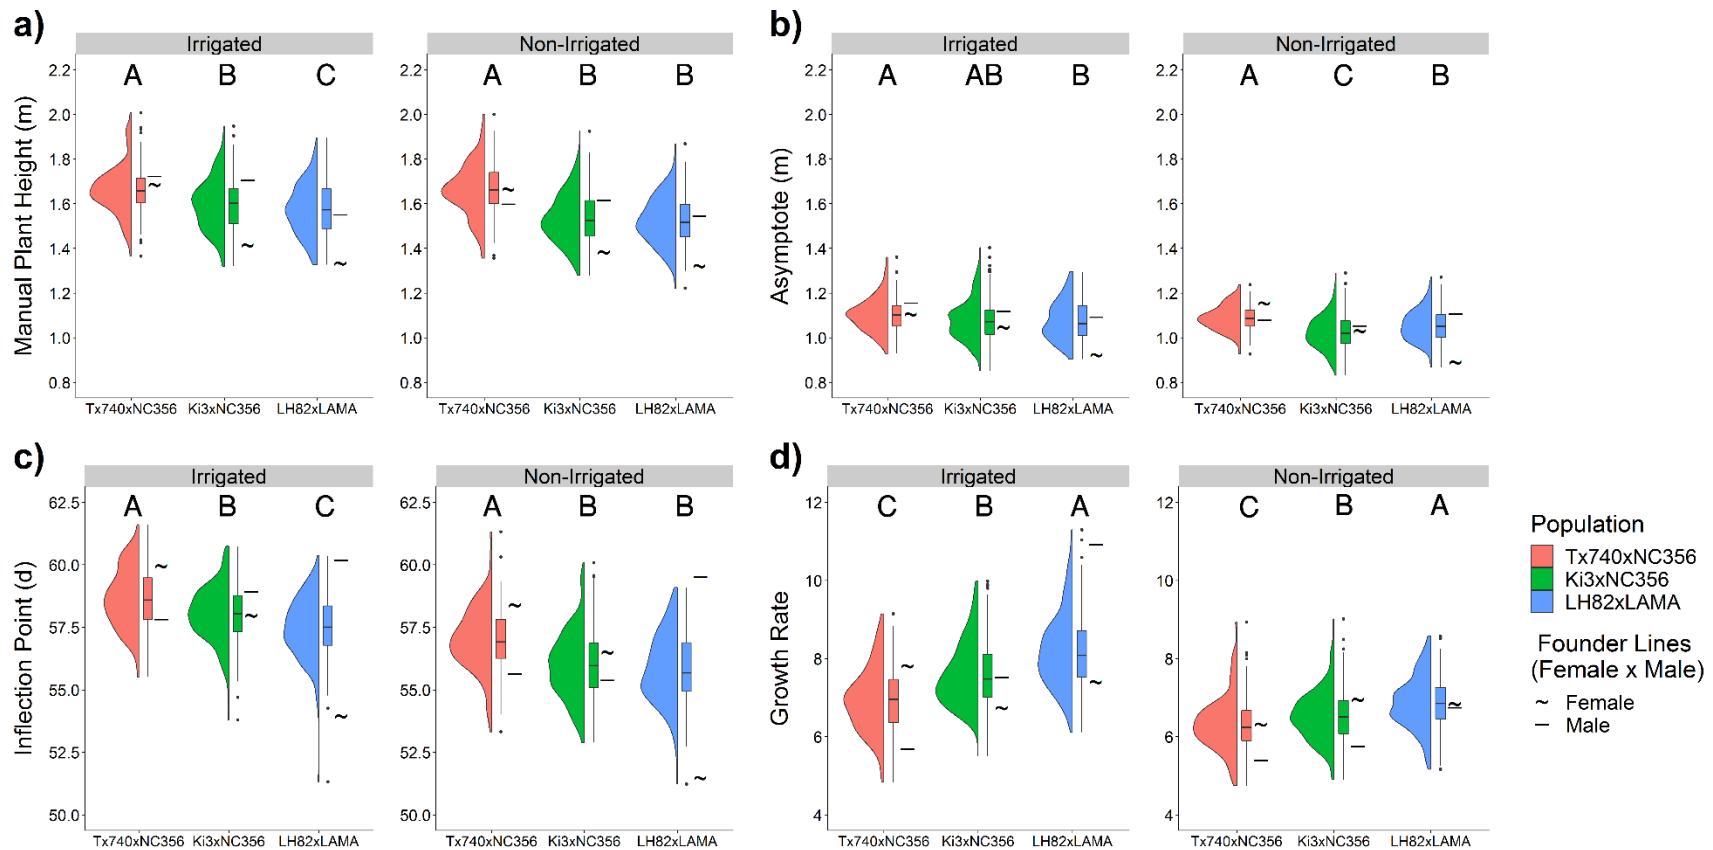194  
195

196 **Fig 4. Distribution of Weibull functional parameters.** Entry BLUPS of [a] manual terminal plant height, [b]  
 197 Weibull inflection point, and [d] Weibull growth rate for each mapping population demonstrated variability both within and between  
 198 these populations with substantial transgressive segregation in most cases. Letters above define significant differences in means at  
 199  $\alpha=0.05$ .

200 cells are both dividing and elongating within the internodes above the ear node [45-47]. Significant  
201 differences were found in the maximum AGR across populations within the irrigated trial (48, 52,  
202 and 56 mm d<sup>-1</sup>) and LH82xLAMA was 3 mm d<sup>-1</sup> greater than the other populations in the non-  
203 irrigated trial despite being the shortest population overall. A reduction in AGR was observed  
204 within the non-irrigated trial (4, 7, and 8 mm d<sup>-1</sup> Tx740xNC356, Ki3xNC356, and LH82xLAMA,  
205 respectively) likely due to water stress during this period [48]. Overall this demonstrated that the  
206 AGR had heritable genetic diversity and was phenotypically plastic in response to different  
207 environmental conditions.

## 208 **QTL mapping**

209 **Manual terminal height associations.** Nine QTL were identified for PHTTRML across the  
210 three populations and two environments (S3 Table) each explaining 5.1 to 9.4% of genetic  
211 variance. All PHTTRML associations had additive effects of ~3 cm (S3 Table). One region was  
212 identified across two populations q1\_172 (LH82xLAMA; irrigated) and q1\_176 (Tx740xNC356;  
213 non-irrigated), localizing to the 280 to 284 Mbs region of chromosome 1. We identified a single  
214 genomic region, 98 to 128 Mbs on chromosome 2 that co-localized within the same genetic  
215 background (Ki3xNC356) across different environmental treatments (q2\_70 irrigated and q2\_69  
216 non-irrigated). The limited co-localization of QTLs across bi-parental populations is part of the  
217 difficulty of identifying genomic regions that can be utilized in genetic backgrounds beyond  
218 those in which they were discovered [49, 50]. This also demonstrated the lack of statistical  
219 power in the smaller of the three populations Tx740xNC356 (n=110). It has been empirically  
220 shown that population size is the most critical factor in QTL linkage mapping [24].

221 **Functional parameter associations.** UAS estimates in modeling temporal growth of maize can  
222 identify dynamic QTL [51]. Analysis of QTLs using the three functional parameters of the

223 Weibull curve as phenotypes identified 13, 9, and 12 significant marker associations with the  
224 asymptote, growth rate, and inflection point, respectively (S5 Table). Asymptote QTLs explained  
225 genetic variation ranging from 3.4% to 14.3% with additive effects ranging from 2 to 5 cm,  
226 consistent with PHTTRML. High correlations between asymptote and PHTTRML indicated that  
227 similar QTL would likely be detected using both traits. Two PHTTRML QTLs, *q1\_172*  
228 *LH82xLAMA* (irrigated) and *q1\_176 Tx740xNC356* (non-irrigated), co-localized with an  
229 asymptote QTL, *q1\_173* of *LH82xLAMA* (irrigated) (Fig 5; S3 Table). Additional co-  
230 localizations were found between *q6\_67 Tx740xNC356* (irrigated) asymptote and *q6\_62*  
231 *Ki3xNC356* (irrigated) PHTTRML, as well as, *q8\_10 LH82xLAMA* (non-irrigated) asymptote  
232 with *q8\_14 Ki3xNC356* (irrigated) PHTTRML and *q8\_12 Ki3xNC356* (non-irrigated)  
233 PHTTRML.

234         The seven growth rate QTL each explained 5.6 to 15% of the genotypic variance with  
235 additive effects ranging from 0.2 to 0.3 DAS<sup>-1</sup> (S5 Table). Inflection point QTL each explained 4.3  
236 to 13% of the genotypic variance with additive effects ranging from 0.2 to 0.5 d (S5 Table).  
237 Irrigated *Ki3xNC356* trial *q4\_61* and irrigated *LH82xLAMA q1\_173/q1\_176* were associated  
238 with inflection point and asymptote, while non-irrigated *LH82xLAMA q10\_20* was associated  
239 with inflection point and growth rate (S5 Table). The co-localization of QTL associated with  
240 multiple parameters of the sigmoidal growth function indicated these regions more than others  
241 may have an effect on defining the overall developmental trajectory of maize height. The limited  
242 number of co-localizations demonstrates these traits are both genetically variable and highly  
243 plastic with the environment.

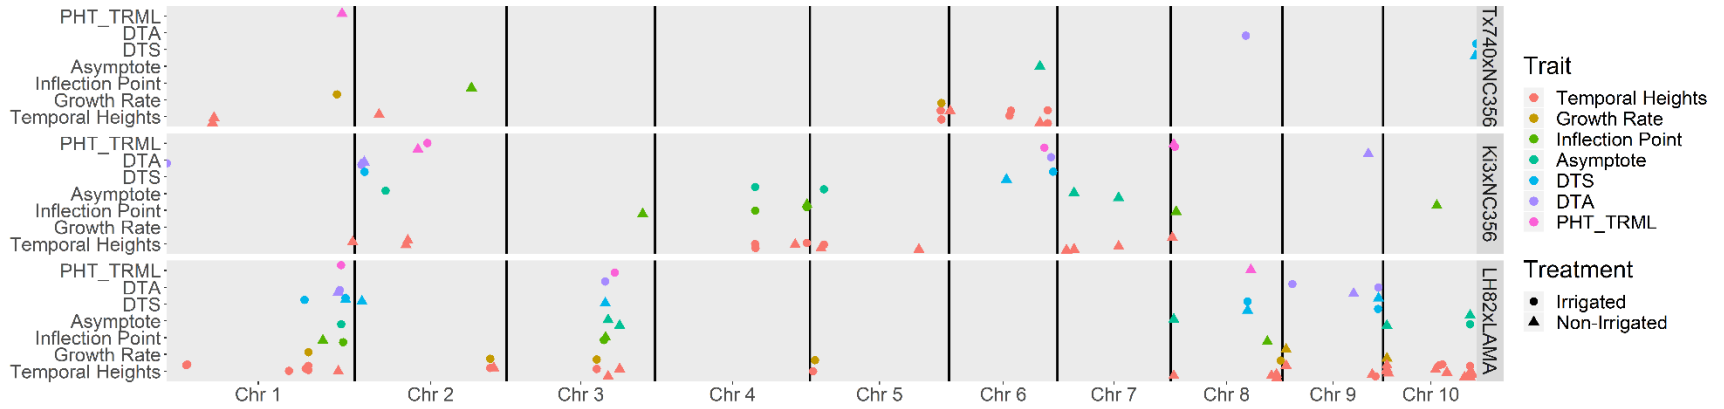

244

245 **Fig 5. Col-localization of agronomic and functional growth QTL associations.** Significant QTL co-localized across agronomic  
 246 traits (PHT\_TRML: Manual, terminal plant height; DTA: Days to anthesis; DTS: Days to silking), functional growth parameters  
 247 (asymptote, inflection point, growth rate) and temporal height estimates from the Weibull curves. Temporal expression of all height  
 248 QTL can be visualized in **S4 Fig**.

249 Multiple QTL were identified within the LH82xLAMA trials for  $PHT_{TRML}$ , asymptote,  
250 inflection point, and flowering time (DTA/DTS; S4 Table) within the 273 to 287 Mbs region of  
251 chromosome 1 and the 140 to 176 Mbs region of chromosome 3 (Fig 5). The QTL region of  
252 chromosome 3 harbors *ZmMADS69* (GRMZM2G171650; Chr3: 158979321..159007265), a  
253 regulator of flowering time with pleiotropic effects on plant height. *ZmMADS69* has higher  
254 expression levels in temperate compared to tropical germplasm, leading to significant detection in  
255 temperate by tropical crosses [52], such as LH82xLAMA among others  
256 [23, 24, 53]. The identified region on chromosome 1 contained the *viviparous8* (*vp8*;  
257 GRMZM2G010353; Chr1: 286390345..286398537) locus which exhibits dwarfism due to reduced  
258 cell proliferation [54]. Both loci may be deterministic QTL (dQTL) because the differential allelic  
259 variation affected the whole growth process [55] and was unaffected by environmental stimuli;  
260 *ZmMADS69* effect was not influenced by day length [52] and *vp8* exhibited normal plant  
261 hormone response [54]. These results coupled with basic biological understanding indicated that  
262 allelic changes in loci can have a fundamental impacts on the functional growth trajectory of maize,  
263 in contrast to the small shift in phenotypic expression of a single trait It is therefore understandable  
264 that these two “major genes” have been previously identified and described in multiple studies,  
265 while the smaller and ephemeral effect loci are mostly unknown.

266

267 **Temporal QTL expression.** In addition to detecting QTL for the three parameters of the  
268 Weibull function, 58 QTL were also detected using individuals’ daily heights from 20 to 85 DAS  
269 predicted using the Weibull function. Between 4 and 20 unique QTLs were identified, based on  
270 peak position (Fig 5; S6 Table). Comparison of mean physical distance of the flanking markers  
271 for each the 58 unique QTLs demonstrated 23 QTLs were within 1 Mbp of a plant height

272 candidate gene and an additional 18 QTL were less than 5 Mbp from a candidate gene. Most of  
273 the 58 unique QTLs demonstrated a very dynamic nature of QTL affecting plant height  
274 throughout the growing season. For example, q5\_119 in the irrigated Tx740xNC356 trial, was  
275 detected from 22 to 62 DAS explaining 21% of the genetic variation at 54 DAS (Fig 6a; S6  
276 Table). In comparison, q5\_35 of irrigated Tx740xNC356 trial was detected from 66 to 74 DAS  
277 explaining 11% of the genetic variation at 67 DAS (Fig 6a). Temporal QTL expression was  
278 different for each population across environmental treatments (i.e. irrigation) demonstrating  
279 differential genomic localization while maintaining similarities in temporal expression.  
280 Specifically, within the Tx740xNC356 population, both irrigation regimens (i.e. environments)  
281 have a temporally broad QTL (q5\_119 irrigated and q2\_55 non- irrigated) prior to inflection  
282 point (~58 DAS), followed by QTLs detected at shorter temporal intervals after the inflection  
283 point and may relate to the elongation of specific internode groupings [45-47]. Additionally,  
284 trends in QTL temporal expression between populations exhibited unique temporal expression  
285 patterns. For example, Tx740xNC356 exhibited QTLs prior to the inflection point at early  
286 growth stages, whereas Ki3xNC356 exhibited no detectable QTLs until ~50 DAS. Low  
287 phenotypic variation could be the cause, as could, greater numbers of smaller effect loci, towards  
288 an infinitesimal model, that would also be hard to detect.

289 Identified QTLs demonstrated dynamic trends in additive phenotypic effects (Fig 6, right  
290 side). In general, these results show that the additive effects found at the peak significance DAS  
291 of a temporal QTL is a result of the cumulative effect of a gradual increase in the effect size of  
292 each genomic region (Fig 6). QTLs with peak expression early within the season had  
293 significantly smaller additive effect estimates than at later points in the growing season; due to  
294 reduced overall variation across individuals in the population at early growth stages (e.g. Fig 6b



295

**a) Tx740xNC356 Irrigated**

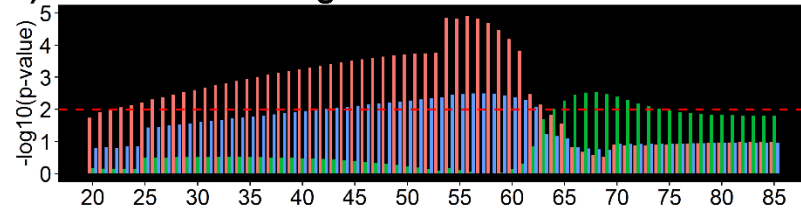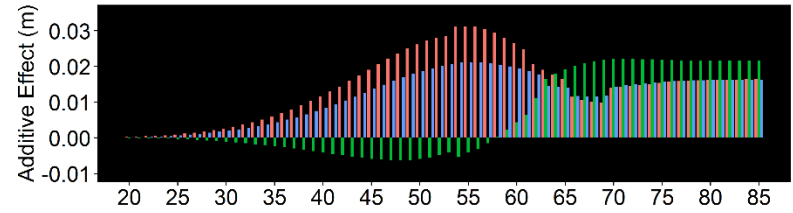

**b) Tx740xNC356 Non-Irrigated**

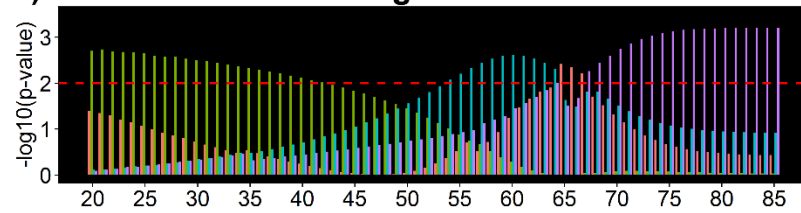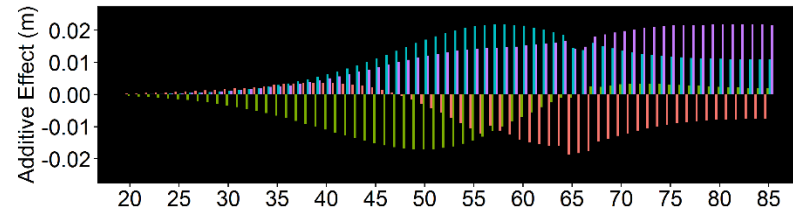

**c) Ki3xNC356 Irrigated**

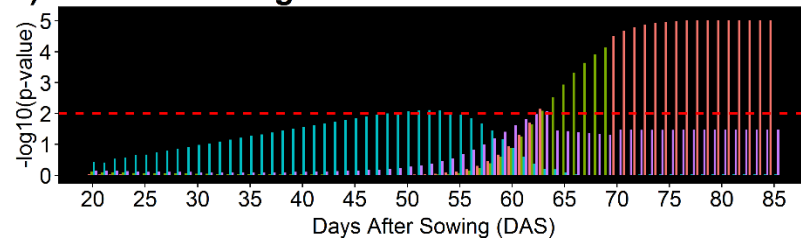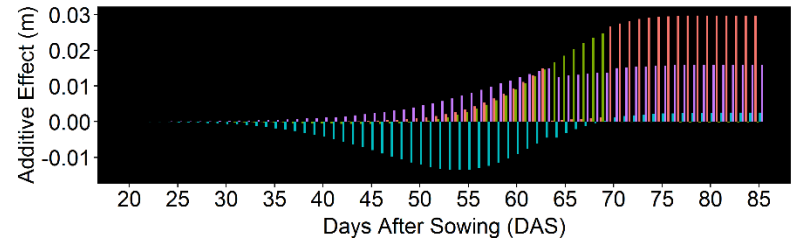

296

297 **Fig 6. Visualization of temporal trends in QTL expression.** Temporal trends in QTL expression were observed in all QTL across  
298 populations and environments. Most QTL were under the significance threshold (left side) of LOD=2 (red dashed line)  
299 during the growing season; however the smaller additive effects (right side) during these periods would not have been expected to be  
300 declared a QTL.  
301

302 *q2\_55*). Some QTL effects (Fig 6b *q6\_0*) also appeared to lose their association throughout  
303 season, however it is likely due to their effects statistically being diluted by new QTL that  
304 become significant (Fig 6b *q6\_67*). While most individual QTL maintained their directional  
305 effect (Fig 6a; *q5\_119* and *q6\_75*), some surprisingly switched effect directions within the  
306 growing season (*q6\_35*). Understanding the biological basis of this switching phenomena would  
307 be both interesting and important for optimizing plant growth. Caution should be used to  
308 interpret all of these QTL as loci that functionally affect height and plant growth rather than  
309 height QTL per se; loci affecting rooting, plant health or photoperiod sensitivity all could impact  
310 plant measured height.

311         Analysis across the entire linkage map demonstrated that directional changes in additive  
312 effect size were present during the growing season (S4 and S5 Fig). Within marker assisted  
313 selection protocols, targeting consistent directional effects may result in greater gains than those  
314 of temporal bi-directional effects. Before additional work is conducted temporal effect size should  
315 first be validated through near isogenic lines across genetic backgrounds or in heterogeneous  
316 inbred families [56]. However, we speculate that the temporal trend of the effect size, like many  
317 QTL effects remains dependent on the genetic background, abiotic, and biotic interactions  
318 experienced in each environment, and this G x E interaction. If temporal shifts in directional effect  
319 are valid and not due to over inflations via false positives and limited population size; statistical  
320 models accounting for directional effect shifts will be necessary to incorporate temporal datasets  
321 of dynamic, quantitative traits within prediction modeling approaches to plant breeding, such as  
322 genomic selection.

323

324

## 325 **Materials and methods**

### 326 **Germplasm material and experimental design**

327           Three bi-parental mapping populations were developed from breeding lines segregating for  
328 loci discovered in an earlier genome wide association study [28, 57] of hybrids for height and grain  
329 yield. The recombinant inbred line (RIL) progeny were derived from the crosses of Tx740xNC356  
330 (tropical/tropical; 110 RILs), Ki3xNC356 (tropical/tropical; 239 RILs) and LH82xLAMA-YC  
331 (temperate/tropical; 178 RILs). Tx740 (LAMA2002-12-1-B-B-B) [58] is a parent in the “LAMA”  
332 inbred line (pedigree [((LAMA2002-12-1-B-B-B-B/LAMA2002-1-5-B-B-B-B)-3-2-B-1-B3-B)]) and  
333 these two lines would be expected to share 50% of their genome. In 2018, the mapping populations  
334 were planted in a randomized complete block design (RCBD) with two replications across two  
335 environments (irrigated and non-irrigated) having dimensions of 0.76 m row spacing, and 3.81 m  
336 plot lengths.

337

### 338 **Unoccupied aerial system image collection**

339           Two platforms were used, a rotary wing and a fixed wing UAV, to collect RGB data. For  
340 the rotary wing, a DJI Phantom 3 Professional with a 12-megapixel DJI FC300X camera was flown  
341 at an altitude of 25 m with to 80% forward and side image overlap. Fixed wing images were  
342 collected using a Tuffwing UAV Mapper (<http://www.tuffwing.com>) equipped with a 24-  
343 megapixel Sony a6000 RGB camera. Fixed wing surveys were conducted at a 120 m altitude with  
344 80% image overlap. A total of 19 DJI Phantom 3 Professional flights were conducted throughout  
345 the growing season, while 11 Tuffwing UAV Mapper flights (starting 05/17/2018) were conducted  
346 after early season to mechanical setbacks of the Tuffwing (S2 Table). After QC/QA, a total of 16  
347 flights were used for height estimates based on quality of the processed orthomosaic images.

348 All of the Tuffwing flights were processed in Agisoft PhotoScan [59], while the majority  
349 of the DJI Phantom flights were processed in Pix4Dmapper [60], based on collaborators comfort  
350 and preference with the associated software. In general, these software packages are equivalent  
351 and used to identify common features (tie points) across images followed by triangulation and  
352 distortion adjustment optimization to generate densified 3D point clouds, DSM, and orthomosaic  
353 images. Height estimates were extracted from the three dimensional point clouds following the  
354 procedures of [15]. In short, the ground points were identified from the point cloud using the  
355 hierarchical robust interpolation algorithm within FUSION/LDV. Identified ground points were  
356 used to interpolate the digital elevation model, followed by subtracting the DEM from the original  
357 point cloud to produce the canopy surface model. The plot level polygon shapefiles were created  
358 using the R/UAStools::plotshpcreate [15] function in R and the 95<sup>th</sup> percentile height estimates  
359 were extracted for each experimental plot.

360

## 361 **Statistical Inference**

362 **Variance component estimates and heritability.** From the extracted canopy height metrics  
363 (P95), we fit mixed linear models utilizing residual maximum likelihood (REML) in JMP  
364 version 14.0.0 [61] to define best linear unbiased predictors (BLUPs) of the inbreds by their  
365 entry number. Models were fit on a per flight date basis. The individual mapping populations  
366 were evaluated as a randomized complete block design (RCBD, Eq. 1) including spatial  
367 regression (range and row [furrow irrigation runs down rows], this is called row and column,  
368 respectively, where furrow irrigation is not used).

369

$$370 \quad Y = \mu + \sigma_G^2 + \sigma_r^2 + \sigma_i^2 + \sigma_j^2 + \sigma_\varepsilon^2 \quad (1)$$

371

372

373 with terms entry ( $\sigma_e^2$ ), replicate ( $\sigma_r^2$ ) range ( $\sigma_i^2$ ), row ( $\sigma_j^2$ ) and residual error ( $\sigma_\varepsilon^2$ ).

374 Broad sense heritability ( $H^2$ ) estimates were calculated on an entry means basis (Eq.2).

375

376 
$$H^2 = \frac{\sigma_e^2}{\sigma_e^2 + \sigma_\varepsilon^2/r} \quad (2)$$

377

378 Within each environment,  $H^2$  estimates were calculated for each population separately while  
379 including replicates (r) for each of the UAS flight dates.

380

381 **Nonlinear function.** The three parameter Weibull sigmoid growth model (Eq. 3) was used to  
382 summarize the

383

384 
$$f(x) = L \left( 1 - e^{-\left(x/x_0\right)^b} \right) \quad (3)$$

385

386 height as a function of DAS (x) with the asymptote (L), inflection point ( $x_0$ ), and the growth rate  
387 (b) of the fitted curve. The asymptote (L; m) is maximum value of the curve which represents  
388 maximum/terminal plant height (PHT<sub>TRML</sub>). The inflection point ( $x_0$ ; DAS) indicates the DAS  
389 where the slope of the logarithmic phase is at its absolute maximum. The growth rate (b) is an  
390 empirical constant which defines the shape of the curve and relates to the absolute growth rate (Eq.  
391 4;  $m \text{ d}^{-1}$ ) when  $x=x_0$ . Sigmoidal curves were fit using the Fit Curve tool in JMP 14 and

392

393

$$\frac{\delta y}{\delta x} \left( L \left( 1 - e^{-\left( \frac{x}{x_0} \right)^b} \right) \right) = \frac{L b e^{-\left( \frac{x}{x_0} \right)^b} \left( \frac{x}{x_0} \right)^{b-1}}{x} \quad (4)$$

394

395 parameters were estimated on an entry basis utilizing the extracted BLUPs or the individual  
396 environment REML models described above. Significance of the functional parameters were  
397 evaluated using the chi squared ( $X^2$ ) test ( $\alpha = 0.05$ ,  $df = 1$ ) to identify logistical curves with poor  
398 fits to UAS height estimates, these were subsequently removed from future analysis. Using the  
399 associated Weibull functional parameters, height estimates were imputed on one day intervals (1  
400 to 85 DAS) for each inbred entry in their associated environments.

#### 401 **Genotyping and linkage map construction**

402 The genotyping was described in Chen, Murray (62), and is paraphrased here. Genotype  
403 samples were collected from  $F_{3,4}$  seedlings grown under greenhouse conditions, where eight  
404 samples were bulked per genotype. The CTAB method [63] was used to extract DNA and samples  
405 were sent to AgReliant Genetics LLC, where they were genotyped by Infinium® assays for 17,444  
406 single nucleotide polymorphisms (SNPs). The linkage groups and physical locations were  
407 provided with the SNP chip of which 716 markers locations were unknown or withheld due to  
408 intellectual property rights, resulting in 17,019 SNPs with known reference locations (B73  
409 RefGEN\_v3).

410 Individuals with >10% missing values and SNPs with >10% missing values were dropped  
411 from the data set resulting in 5316, 5628, and 6231 polymorphic SNPs for the Ki3/NC356,  
412 Tx740/NC356, and LH82/LAMA populations, respectively. Crosspoints were predicted using the

413 crosspoint subcommand of SNPbinner [64] to clean data set of double recombinants. The emission  
414 probability was set to 0.9 (-p 0.9), the continuous genotype region was set to 0.1% (-r 0.001) of  
415 the chromosome size, and the transition probability was calculated using a crosscount of 7,500,000  
416 (-c 7,500,000). The visualize subcommand was used to evaluate the efficiency of the calculated  
417 break points to the original SNP calls and identify satisfactory crosspoint parameters. The  
418 crosspoint output identified break point locations for each RIL and the prediction of genotypic  
419 homogeneity of each region between breakpoint and the SNP calls were adjusted accordingly.  
420 Marker datasets filtered by SNPbinner were constructed into linkage maps using the MAP function  
421 of QTL IciMapping version 4.1.0.0 (<http://www.isbreeding.net/>) software. Redundant markers  
422 were identified using the “BIN” functionality and redundant markers with greater missing data  
423 rate were excluded. Linkage groups were defined by “By Anchor Only” setting and the marker  
424 orders were defined by their physical locations using the “By Input” ordering algorithm.  
425 Recombination frequencies between markers were calculated based on F<sub>3</sub> marker frequencies by  
426 denoting the “POP.ID” to eight.

427         The final genetic maps consisted of 1530, 2571, and 2324 SNPs after removal of redundant  
428 markers. The genetic map distances were calculated in QTL IciMapping using the Kosambi  
429 mapping function, and the total map lengths were estimated to be 1315, 1207, and 1474 cM for  
430 the Tx740xNC356, Ki3xNC356, and LH82xLAMA populations, respectively.

### 431 **Linkage Mapping**

432         The entries phenotyped in 2018 were advanced several generations following initial DNA  
433 extraction at F<sub>3,4</sub> and were evaluated in the field at F<sub>6</sub> generation or greater. For this reason,  
434 heterozygous calls (1) were set to missing (-1) and QTL analysis was performed assuming RIL  
435 genotype frequencies (“POP.ID” = 4). Analysis by other methods (e.g. treating as F<sub>3</sub>) were also

436 tested to ensure conclusions were similar, but detection power was much lower, likely due to the  
437 software trying to fit dominance effects expected to be rare or absent by the  $F_6$  generation.  
438 Inclusive Composite Interval Mapping [65] of Additive (ICIM-ADD) QTL was conducted in the  
439 QTL IciMapping v4.1 using the BIP (QTL mapping for bi-parental populations) function. The step  
440 parameter was set to 1.0 cM and the probability of inclusion in the stepwise regression (PIN) was  
441 set to 0.001. The focus of this study was on understanding the temporal shifts in the marker trait  
442 associations of plant height, rather than identifying regions of high confidence that could be used  
443 in later marker assisted selection. For these reasons, we defined QTL of interest liberally as those  
444 with LOD > 2.0 and percent variation explained  $\geq 3\%$  [66], however LOD and other metrics are  
445 provided to extract more conservative thresholds. Using the imputed heights from 1 to 85 DAS,  
446 ICIM-ADD was performed on each DAS, for each population in each environment separately to  
447 access the temporal shifts in allelic effects and marker–trait associations.

448 A list of candidate genes was obtained from Wallace, Zhang (25). In short, candidate genes  
449 were identified from (i) literature, (ii) mining the MaizeGDB database for known height mutants,  
450 and (iii) searching the maize genome annotation on Phytozome genes annotated with “auxin”,  
451 “brassinosteroid” and/or “gibberellin”. Distance for the center of the QTL confidence interval to  
452 nearest candidate gene with the same chromosome were identified.

#### 453 **Data Availability**

454 All of the raw and processed data relevant to this study is publically available on Dryad  
455 Digital Repository (68). All raw and processed image output files from this study are publicly  
456 available and can be obtained by request to the authors.



## 457 Acknowledgements

458 The authors would like to acknowledge Misty Miles and all members of the Texas A&M UAS  
459 project. David Rooney, Jacob Pekar and Stephen Labar for their agronomic and technical support.  
460 Graduate students and undergraduate/high school employees for their hard work and effort  
461 maintaining fields and collecting phenotypic data. Special thank you to AgReliant Genetics, LLC.  
462 and Dr. Ivan D. Barrero Farfan for funding and conducting the genotyping for this research. This  
463 project was made possible by financial support from USDA-NIFA-AFRI Award No. 2017-67013-  
464 26185 USDA-NIFA Hatch funds Texas A&M AgriLife Research the Texas Corn Producers Board  
465 the Iowa Corn Promotion Board the Eugene Butler Endowed Chair in Biotechnology and the Texas  
466 A&M College of Agriculture and Life Sciences Tom Slick Senior Graduate Fellowship.

## 467 **Author contributions:**

468 S.L.A. conceptualization, data curation, formal analysis, investigation, methodology, original  
469 draft, review and editing (lead), supervision, validation, visualization; S.C.M. conceptualization,  
470 funding acquisition, methodology, project administration, supervision, resources, review and  
471 editing (supporting); Y.C. data curation, methodology, review and editing (supporting); L.M. data  
472 curation, formal analysis, investigation, methodology, review and editing (supporting), software;  
473 S.P. conceptualization, funding acquisition, resources, review and editing (supporting), software,  
474 supervision; D.C.: conceptualization, funding acquisition, resources, review and editing  
475 (supporting), supervision; A.C. data curation, formal analysis, investigation, methodology,  
476 review and editing (supporting), software; J.J. data curation, formal analysis, investigation,  
477 methodology, resources, review and editing (supporting), software, supervision; I.D.B.F.: data  
478 curation, resources, funding acquisition, review and editing (supporting).

479

## 480 **References**

- 481 1. Pauli D, Chapman SC, Bart R, Topp CN, Lawrence-Dill CJ, Poland J, et al. The quest for  
482 understanding phenotypic variation via integrated approaches in the field environment. *Plant*  
483 *Physiology*. 2016;172(2):622-34.
- 484 2. Furbank RT, Tester M. Phenomics—technologies to relieve the phenotyping bottleneck.  
485 *Trends in Plant Science*. 2011;16(12):635-44.
- 486 3. Araus JL, Cairns JE. Field high-throughput phenotyping: the new crop breeding frontier.  
487 *Trends in Plant Science*. 2014;19(1):52-61.
- 488 4. Araus JL, Kefauver SC, Zaman-Allah M, Olsen MS, Cairns JE. Translating high-throughput  
489 phenotyping into genetic gain. *Trends in Plant Science*. 2018;23(5):451-66. doi:  
490 10.1016/j.tplants.2018.02.001.
- 491 5. Sankaran S, Khot LR, Espinoza CZ, Jarolmasjed S, Sathuvalli VR, Vandemark GJ, et al.  
492 Low-altitude, high-resolution aerial imaging systems for row and field crop phenotyping: A  
493 review. *European Journal of Agronomy*. 2015;70:112-23.
- 494 6. Shi Y, Thomasson JA, Murray SC, Pugh NA, Rooney WL, Shafian S, et al. Unmanned aerial  
495 vehicles for high-throughput phenotyping and agronomic research. *PloS One*.  
496 2016;11(7):e0159781.
- 497 7. Pugh N, Horne DW, Murray SC, Carvalho G, Malambo L, Jung J, et al. Temporal estimates  
498 of crop growth in sorghum and maize breeding enabled by unmanned aerial systems. *The*  
499 *Plant Phenome Journal*. 2018;1(1).
- 500 8. Malambo L, Popescu S, Murray S, Putman E, Pugh N, Horne D, et al. Multitemporal field-  
501 based plant height estimation using 3D point clouds generated from small unmanned aerial  
502 systems high-resolution imagery. *International Journal of Applied Earth Observation and*  
503 *Geoinformation*. 2018;64:31-42.
- 504 9. Chu T, Starek MJ, Brewer MJ, Murray SC, Pruter LS. Characterizing canopy height with  
505 UAS structure-from-motion photogrammetry—results analysis of a maize field trial with  
506 respect to multiple factors. *Remote Sensing Letters*. 2018;9(8):753-62.
- 507 10. Bendig J, Bolten A, Bennertz S, Broscheit J, Eichfuss S, Bareth G. Estimating biomass of  
508 barley using crop surface models (CSMs) derived from UAV-based RGB imaging. *Remote*  
509 *Sensing*. 2014;6(11):10395-412.
- 510 11. De Souza CHW, Lamparelli RAC, Rocha JV, Magalhães PSG. Height estimation of  
511 sugarcane using an unmanned aerial system (UAS) based on structure from motion (SfM)  
512 point clouds. *International Journal of Remote Sensing*. 2017;38(8-10):2218-30.
- 513 12. Holman FH, Riche AB, Michalski A, Castle M, Wooster MJ, Hawkesford MJ. High  
514 throughput field phenotyping of wheat plant height and growth rate in field plot trials using  
515 UAV based remote sensing. *Remote Sensing*. 2016;8(12):1031.
- 516 13. Watanabe K, Guo W, Arai K, Takanashi H, Kajiya-Kanegae H, Kobayashi M, et al. High-  
517 throughput phenotyping of sorghum plant height using an unmanned aerial vehicle and its  
518 application to genomic prediction modeling. *Frontiers in Plant Science*. 2017;8.
- 519 14. Chang A, Jung J, Maeda MM, Landivar J. Crop height monitoring with digital imagery from  
520 unmanned aerial system (UAS). *Computers and Electronics in Agriculture*. 2017;141:232-7.

- 521 15. Anderson SL, Murray S, Malambo L, Ratcliff C, Popescu S, Cope D, et al. Prediction of  
522 maize grain yield before maturity using improved temporal height estimates of unmanned  
523 aerial systems. *The Plant Phenome Journal*. 2019;2. doi: 10.2135/tppj2019.02.0004.
- 524 16. Anthony D, Elbaum S, Lorenz A, Detweiler C, editors. On crop height estimation with  
525 UAVs. *Intelligent Robots and Systems (IROS 2014)*, 2014 IEEE/RSJ International  
526 Conference on; 2014: IEEE.
- 527 17. Li W, Niu Z, Chen H, Li D, Wu M, Zhao W. Remote estimation of canopy height and  
528 aboveground biomass of maize using high-resolution stereo images from a low-cost  
529 unmanned aerial vehicle system. *Ecological Indicators*. 2016;67:637-48.
- 530 18. Varela S, Assefa Y, Prasad PV, Peralta NR, Griffin TW, Sharda A, et al. Spatio-temporal  
531 evaluation of plant height in corn via unmanned aerial systems. *Journal of Applied Remote*  
532 *Sensing*. 2017;11(3):036013.
- 533 19. Geipel J, Link J, Claupein W. Combined spectral and spatial modeling of corn yield based  
534 on aerial images and crop surface models acquired with an unmanned aircraft system.  
535 *Remote Sensing*. 2014;6(11):10335-55.
- 536 20. Wang X, Zhang R, Song W, Han L, Liu X, Sun X, et al. Dynamic plant height QTL revealed  
537 in maize through remote sensing phenotyping using a high-throughput unmanned aerial  
538 vehicle (UAV). *Scientific Reports*. 2019;9(1):3458.
- 539 21. Han L, Yang G, Yang H, Xu B, Li Z, Yang X. Clustering field-based maize phenotyping of  
540 plant-height growth and canopy spectral dynamics using a UAV remote-sensing approach.  
541 *Frontiers in Plant Science*. 2018;9:1638.
- 542 22. Han L, Yang G, Dai H, Xu B, Yang H, Feng H, et al. Modeling maize above-ground biomass  
543 based on machine learning approaches using UAV remote-sensing data. *Plant Methods*.  
544 2019;15(1):10.
- 545 23. Peiffer JA, Romay MC, Gore MA, Flint-Garcia SA, Zhang Z, Millard MJ, et al. The genetic  
546 architecture of maize height. *Genetics*. 2014;196(4):1337-56.
- 547 24. Anderson SL, Mahan AL, Murray SC, Klein PE. Four parent maize (FPM) population:  
548 Effects of mating designs on linkage disequilibrium and mapping quantitative traits. *The*  
549 *Plant Genome*. 2018;11. doi: 10.3835/plantgenome2017.11.0102.
- 550 25. Wallace JG, Zhang X, Beyene Y, Semagn K, Olsen M, Prasanna BM, et al. Genome-wide  
551 association for plant height and flowering time across 15 tropical maize populations under  
552 managed drought stress and well-watered conditions in Sub-Saharan Africa. *Crop Science*.  
553 2016;56(5):2365-78.
- 554 26. Li X, Zhou Z, Ding J, Wu Y, Zhou B, Wang R, et al. Combined linkage and association  
555 mapping reveals QTL and candidate genes for plant and ear height in maize. *Frontiers in*  
556 *Plant Science*. 2016;7:833.
- 557 27. Farfan IDB, Murray SC, Labar S, Pietsch D. A multi-environment trial analysis shows slight  
558 grain yield improvement in Texas commercial maize. *Field Crops Research*. 2013;149:167-  
559 76.
- 560 28. Chen Y. High-density linkage map construction, mapping of agronomic traits in tropical  
561 maize (*Zea Mays* L.) and validating SNPs controlling maize grain yield and plant height in  
562 southern hybrid testcrosses. Doctoral dissertation.: Texas A&M University. Available  
563 electronically from <http://hdl.handle.net/1969.1/158620>.; 2016.
- 564 29. Katsvairo TW, Cox WJ, Van Es HM. Spatial growth and nitrogen uptake variability of corn  
565 at two nitrogen levels. *Agronomy Journal*. 2003;95(4):1000-11.

- 566 30. Machado S, Bynum E, Archer T, Lascano R, Wilson L, Bordovsky J, et al. Spatial and  
567 temporal variability of corn growth and grain yield. *Crop Science*. 2002;42(5):1564-76.
- 568 31. Mallarino A, Oyarzabal E, Hinz P. Interpreting within-field relationships between crop yields  
569 and soil and plant variables using factor analysis. *Precision Agriculture*. 1999;1(1):15-25.
- 570 32. Yin X, McClure MA, Jaja N, Tyler DD, Hayes RM. In-season prediction of corn yield using  
571 plant height under major production systems. *Agronomy Journal*. 2011;103(3):923-9.
- 572 33. Lawit SJ, Wych HM, Xu D, Kundu S, Tomes DT. Maize DELLA proteins dwarf plant8 and  
573 dwarf plant9 as modulators of plant development. *Plant and Cell Physiology*.  
574 2010;51(11):1854-68.
- 575 34. Multani DS, Briggs SP, Chamberlin MA, Blakeslee JJ, Murphy AS, Johal GS. Loss of an  
576 MDR transporter in compact stalks of maize br2 and sorghum dw3 mutants. *Science*.  
577 2003;302(5642):81-4.
- 578 35. Hartwig T, Chuck GS, Fujioka S, Klempien A, Weizbauer R, Potluri DPV, et al.  
579 Brassinosteroid control of sex determination in maize. *Proceedings of the National Academy  
580 of Sciences*. 2011;108(49):19814-9.
- 581 36. Winkler RG, Helentjaris T. The maize Dwarf3 gene encodes a cytochrome P450-mediated  
582 early step in Gibberellin biosynthesis. *The Plant Cell*. 1995;7(8):1307-17.
- 583 37. Makarevitch I, Thompson A, Muehlbauer GJ, Springer NM. Brd1 gene in maize encodes a  
584 brassinosteroid C-6 oxidase. *PloS One*. 2012;7(1):e30798.
- 585 38. Wang Y, Zhao J, Lu W, Deng D. Gibberellin in plant height control: old player, new story.  
586 *Plant Cell Reports*. 2017;36(3):1-8.
- 587 39. Ferreira FJ, Kieber JJ. Cytokinin signaling. *Current opinion in plant biology*. 2005;8(5):518-  
588 25.
- 589 40. Finkelstein RR. Studies of abscisic acid perception finally flower. *The Plant Cell*.  
590 2006;18(4):786-91.
- 591 41. Huq E. Degradation of negative regulators: a common theme in hormone and light signaling  
592 networks? *Trends in plant science*. 2006;11(1):4-7.
- 593 42. Lorenzo O, Solano R. Molecular players regulating the jasmonate signalling network.  
594 *Current opinion in plant biology*. 2005;8(5):532-40.
- 595 43. Wu R, Lin M. Functional mapping—how to map and study the genetic architecture of  
596 dynamic complex traits. *Nature Reviews Genetics*. 2006;7(3):229.
- 597 44. Holden's Foundation Seeds I, inventorCorn 'LH82' patent 008500037. 1985.
- 598 45. Fournier C, Andrieu B. Dynamics of the elongation of internodes in maize (*Zea mays* L.):  
599 analysis of phases of elongation and their relationships to phytomer development. *Annals of  
600 Botany*. 2000;86(3):551-63.
- 601 46. Morrison T, Kessler J, Buxton D. Maize internode elongation patterns. *Crop Science*.  
602 1994;34(4):1055-60.
- 603 47. Robertson M. Relationships between internode elongation, plant height and leaf appearance  
604 in maize. *Field Crops Research*. 1994;38(3):135-45.
- 605 48. Tardieu F, Reymond M, Muller B, Granier C, Simonneau T, Sadok W, et al. Linking  
606 physiological and genetic analyses of the control of leaf growth under changing  
607 environmental conditions. *Australian Journal of Agricultural Research*. 2005;56(9):937-46.
- 608 49. Beavis W. QTL analyses: power, precision, and accuracy, || in: *Molecular analysis of  
609 complex traits*. (Paterson, AH ed.). CRC Press, Cleveland, USA; 1998.
- 610 50. Jannink J-L, Bink MC, Jansen RC. Using complex plant pedigrees to map valuable genes.  
611 *Trends in plant science*. 2001;6(8):337-42.

- 612 51. Wu R, Lin M. Functional mapping—how to map and study the genetic architecture of  
613 dynamic complex traits. *Nature Reviews Genetics*. 2006;7(3):229-37.
- 614 52. Liang Y, Liu Q, Wang X, Huang C, Xu G, Hey S, et al. Zm MADS 69 functions as a  
615 flowering activator through the ZmRap2. 7 - ZCN 8 regulatory module and contributes to  
616 maize flowering time adaptation. *New Phytologist*. 2019;221(4):2335-47.
- 617 53. Hirsch CN, Foerster JM, Johnson JM, Sekhon RS, Muttoni G, Vaillancourt B, et al. Insights  
618 into the maize pan-genome and pan-transcriptome. *The Plant Cell*. 2014;26(1):121-35.
- 619 54. Lv H, Zheng J, Wang T, Fu J, Huai J, Min H, et al. The maize d2003, a novel allele of VP8,  
620 is required for maize internode elongation. *Plant Molecular Biology*. 2014;84(3):243-57.
- 621 55. Wu R, Wang Z, Zhao W, Cheverud JM. A mechanistic model for genetic machinery of  
622 ontogenetic growth. *Genetics*. 2004;168(4):2383-94.
- 623 56. Tuinstra M, Ejeta G, Goldsbrough P. Heterogeneous inbred family (HIF) analysis: a method  
624 for developing near-isogenic lines that differ at quantitative trait loci. *Theoretical and  
625 Applied Genetics*. 1997;95(5-6):1005-11.
- 626 57. Farfan IDB, Gerald N, Murray SC, Isakeit T, Huang P-C, Warburton M, et al. Genome wide  
627 association study for drought, aflatoxin resistance, and important agronomic traits of maize  
628 hybrids in the sub-tropics. *PloS One*. 2015;10(2):e0117737.
- 629 58. Mayfield K, Betrán FJ, Isakeit T, Odvody G, Murray SC, Rooney WL, et al. Registration of  
630 maize germplasm lines Tx736, Tx739, and Tx740 for reducing preharvest aflatoxin  
631 accumulation. *Journal of Plant Registrations*. 2012;6(1):88-94.
- 632 59. AgiSoft PhotoScan Professional. (Version 1.2.6) (Software). Retrieved from  
633 <http://www.agisoft.com/downloads/installer/>. 2016.
- 634 60. Pix4Dmapper. Pix4D SA. [www.pix4d.com](http://www.pix4d.com). 2018.
- 635 61. JMP®. Version 14.0.0. SAS Institute Inc, Cary, NC, 1989-2018. 2018.
- 636 62. Chen Y, Murray SC, Barrero ID, Kolomiets MV, Rooney WL, Wang F. Validating SNPs'  
637 effects on maize grain yield and plant height in Txxas testcross hybrids. *Molecular Breeding*.  
638 In Preparation.
- 639 63. Chen D-H, Ronald P. A rapid DNA minipreparation method suitable for AFLP and other  
640 PCR applications. *Plant Molecular Biology Reporter*. 1999;17(1):53-7.
- 641 64. Gonda I, Ashrafi H, Lyon DA, Strickler SR, Hulse-Kemp AM, Ma Q, et al. Sequencing-  
642 based bin map construction of a tomato mapping population, facilitating high-resolution  
643 quantitative trait loci detection. *The Plant Genome*. 2018;12.
- 644 65. Li H, Ye G, Wang J. A modified algorithm for the improvement of composite interval  
645 mapping. *Genetics*. 2007;175(1):361-74.
- 646 66. Li H, Ribaut J-M, Li Z, Wang J. Inclusive composite interval mapping (ICIM) for digenic  
647 epistasis of quantitative traits in biparental populations. *Theoretical and Applied Genetics*.  
648 2008;116(2):243-60.
- 649 67. Archontoulis SV, Miguez FE. Nonlinear regression models and applications in agricultural  
650 research. *Agronomy Journal*. 2015;107(2):786-98.
- 651 68. Anderson SL, Murray SC, Chen Y, Malambo M, Chang A, Popescu S, Cope D, Jung J.  
652 Unoccupied aerial system enabled functional modeling of maize (*Zea mays* L.) height  
653 reveals dynamic expression of loci associated to temporal growth. *Dryad Digital Repository*.

## 654 **Figures**

655 **Fig 1. UAS P95 height estimates summarized by flight date.** Although the three populations  
656 were genetically diverse, the mean growth patterns behaved similarly. Little  
657 differentiation could be seen early in the season between genotypes, where the  
658 measurement error may have been smaller than genotypic differences, as the plants  
659 reached their peak height and flowered, height differences became much greater.

660 **Fig 2. Variance component decomposition of UAS P95 height estimates.** The percent  
661 variation explained in the model of Eq. 1 for individual UAS surveys of three RIL  
662 populations showed that genetic and residual (error) variation, were the main drivers  
663 of variability observed. Total variance (black circles) increased as the plants grew  
664 over later flight dates and was higher for manual (M) than UAS measurements. That  
665 the percent variance measures and heritability were similar for M and UAS suggests  
666 that UAS compressed all variance sources similarly

667 **Fig 3. Nonlinear Weibull functional modeling of growth trajectories.** Sigmoidal curves  
668 based off the Weibull function (Eq. [3]) effectively modeled the growth of each entry.  
669 For each population the female parent (red line) and the male parent (blue line)  
670 crossed over demonstrating that early season height was not predictable by standard  
671 manual terminal height measurements.

672 **Fig 4. Distribution of Weibull functional parameters.** Entry BLUPS of [a] manual terminal  
673 plant height, [b] Weibull asymptote, [c] Weibull inflection point, and [d] Weibull  
674 growth rate for each mapping population demonstrated variability both within and  
675 between these populations with substantial transgressive segregation in most cases.  
676 Letters above define significant differences in means at  $\alpha=0.05$ .

677 **Fig 5. Col-localization of agronomic and functional growth QTL associations.** Significant  
678 QTL co-localized across agronomic traits (PHT\_TRML: Manual, terminal plant  
679 height; DTA: Days to anthesis; DTS: Days to silking), functional growth parameters  
680 (asymptote, inflection point, growth rate) and temporal height estimates from the  
681 Weibull curves. Temporal expression of all height QTL can be visualized in S4 Fig.

682 **Fig 6. Visualization of temporal trends in QTL expression.** Temporal trends in QTL  
683 expression were observed in all QTL across populations and environments. Most  
684 QTL were under the significance threshold (left side) of LOD=2 (red dashed line) at  
685 some point during the growing season; however the smaller additive effects (right  
686 side) during these periods would not have been expected to be declared a QTL.

687

## 688 **Supporting information**

689 **S1 Fig. Tx740xNC356 correlation heatmaps.** Heat map comparing correlations between manual  
690 terminal plant height (PHT), flowering time (DTA/DTS), functional parameters (asymptote,  
691 growth rate, inflection point), and UAS P95 estimates by flight date for the Tx740xNC356  
692 population under [a] irrigated and [b] non-irrigated watering regimens. Growth rate is an empirical  
693 constant of the Weibull function which defines the maximum absolute growth rate ( $m d^{-1}$ ).

694  
695 **S2 Fig. Ki3xNC356 correlation heatmaps.** Heat map comparing correlations between manual  
696 terminal plant height (PHT), flowering time (DTA/DTS), functional parameters (asymptote,  
697 growth rate, inflection point), and UAS P95 estimates by flight date for the Ki3xNC356 population  
698 under [a] irrigated and [b] non-irrigated watering regimens. Growth rate is an empirical constant  
699 of the Weibull function which defines the maximum absolute growth rate ( $m d^{-1}$ ).

700  
701 **S3 Fig. LH82xLAMA correlation heatmaps.** Heat map comparing correlations between  
702 manual terminal plant height (PHT), flowering time (DTA/DTS), functional parameters  
703 (asymptote, growth rate, inflection point), and UAS P95 estimates by flight date for the  
704 LH82xLAMA population under [a] irrigated and [b] non-irrigated watering regimens. Growth rate  
705 is an empirical constant of the Weibull function which defines the maximum absolute growth rate  
706 ( $m d^{-1}$ ).

707  
708 **S4 Fig. Visual representation of temporal QTL.** Significant temporal height QTL. Red indicates  
709 positive allelic effect estimates, blue indicates negative allelic effect estimates, and black indicate  
710 non-significant (NS) genomic regions. Lines represent each of 5316, 5628, and 6231 polymorphic  
711 SNPs for the Ki3/NC356, Tx740/NC356, and LH82/LAMA populations, respectively, across the  
712 genome (X-axis).

713  
714 **S5 Fig. Visual representation of temporal allele effect estimate.** Visual representation of  
715 temporal single marker analysis of the Weibull imputed height estimates. Lines represent each of  
716 5316, 5628, and 6231 polymorphic SNPs for the Ki3/NC356, Tx740/NC356, and LH82/LAMA  
717 populations, respectively, across the genome (X-axis).

718  
719 **S1 Table. Summary of 2018 UAS flight dates.** Summary of 2018 UAS flight dates of the fields  
720 containing the Tx740xNC356, Ki3xNC356, and LH82xLAMA populations, including: days after  
721 sowing (DAS), the number of images captured, the number of calibrated images, spatial resolution  
722 of the mosaic image and mean errors of the GCP geo-referencing.

723  
724 **S2 Table. Descriptive statistics of UAS flight dates by population.** Summary statistics of the  
725 entries for each population (Tx740xNC356, Ki3xNC356, and LH82xLAMA) across the six  
726 identified flight dates with high quality point clouds for the irrigated and non-irrigated trials.

727  
728 **S3 Table. Manual plant height QTL.** Summary of QTL identified using manual terminal plant  
729 height as the associated phenotype. Physical locations (bp) based on B73 RefGen\_3, AGPv3.

730  
731 **S4 Table. Flowering time QTL** Summary of significant QTL for flowering time. Physical  
732 locations (bp) based on B73 RefGen\_3, AGPv3.

733

734 **S5 Table. Function growth parameter QTL.** Summary of significant QTL for functional  
735 parameters of the Weibull sigmoid function. Physical locations (bp) based on B73 RefGen\_3,  
736 AGPv3. Growth rate (GR) is an empirical constant of the Weibull function which defines the  
737 maximum absolute growth rate ( $m\ d^{-1}$ ).

738

739 **S6 Table. Temporal height QTL.** Summary of significant temporal QTL for height estimates  
740 imputed from Weibull sigmoid curve at discrete time points (i.e. DAS where significant  
741 associations were identified.). Physical locations (bp) based on B73 RefGen\_3, AGPv3.

742

743 **S1 File. Statistical methods to identify flight to remove from temporal dataset.**



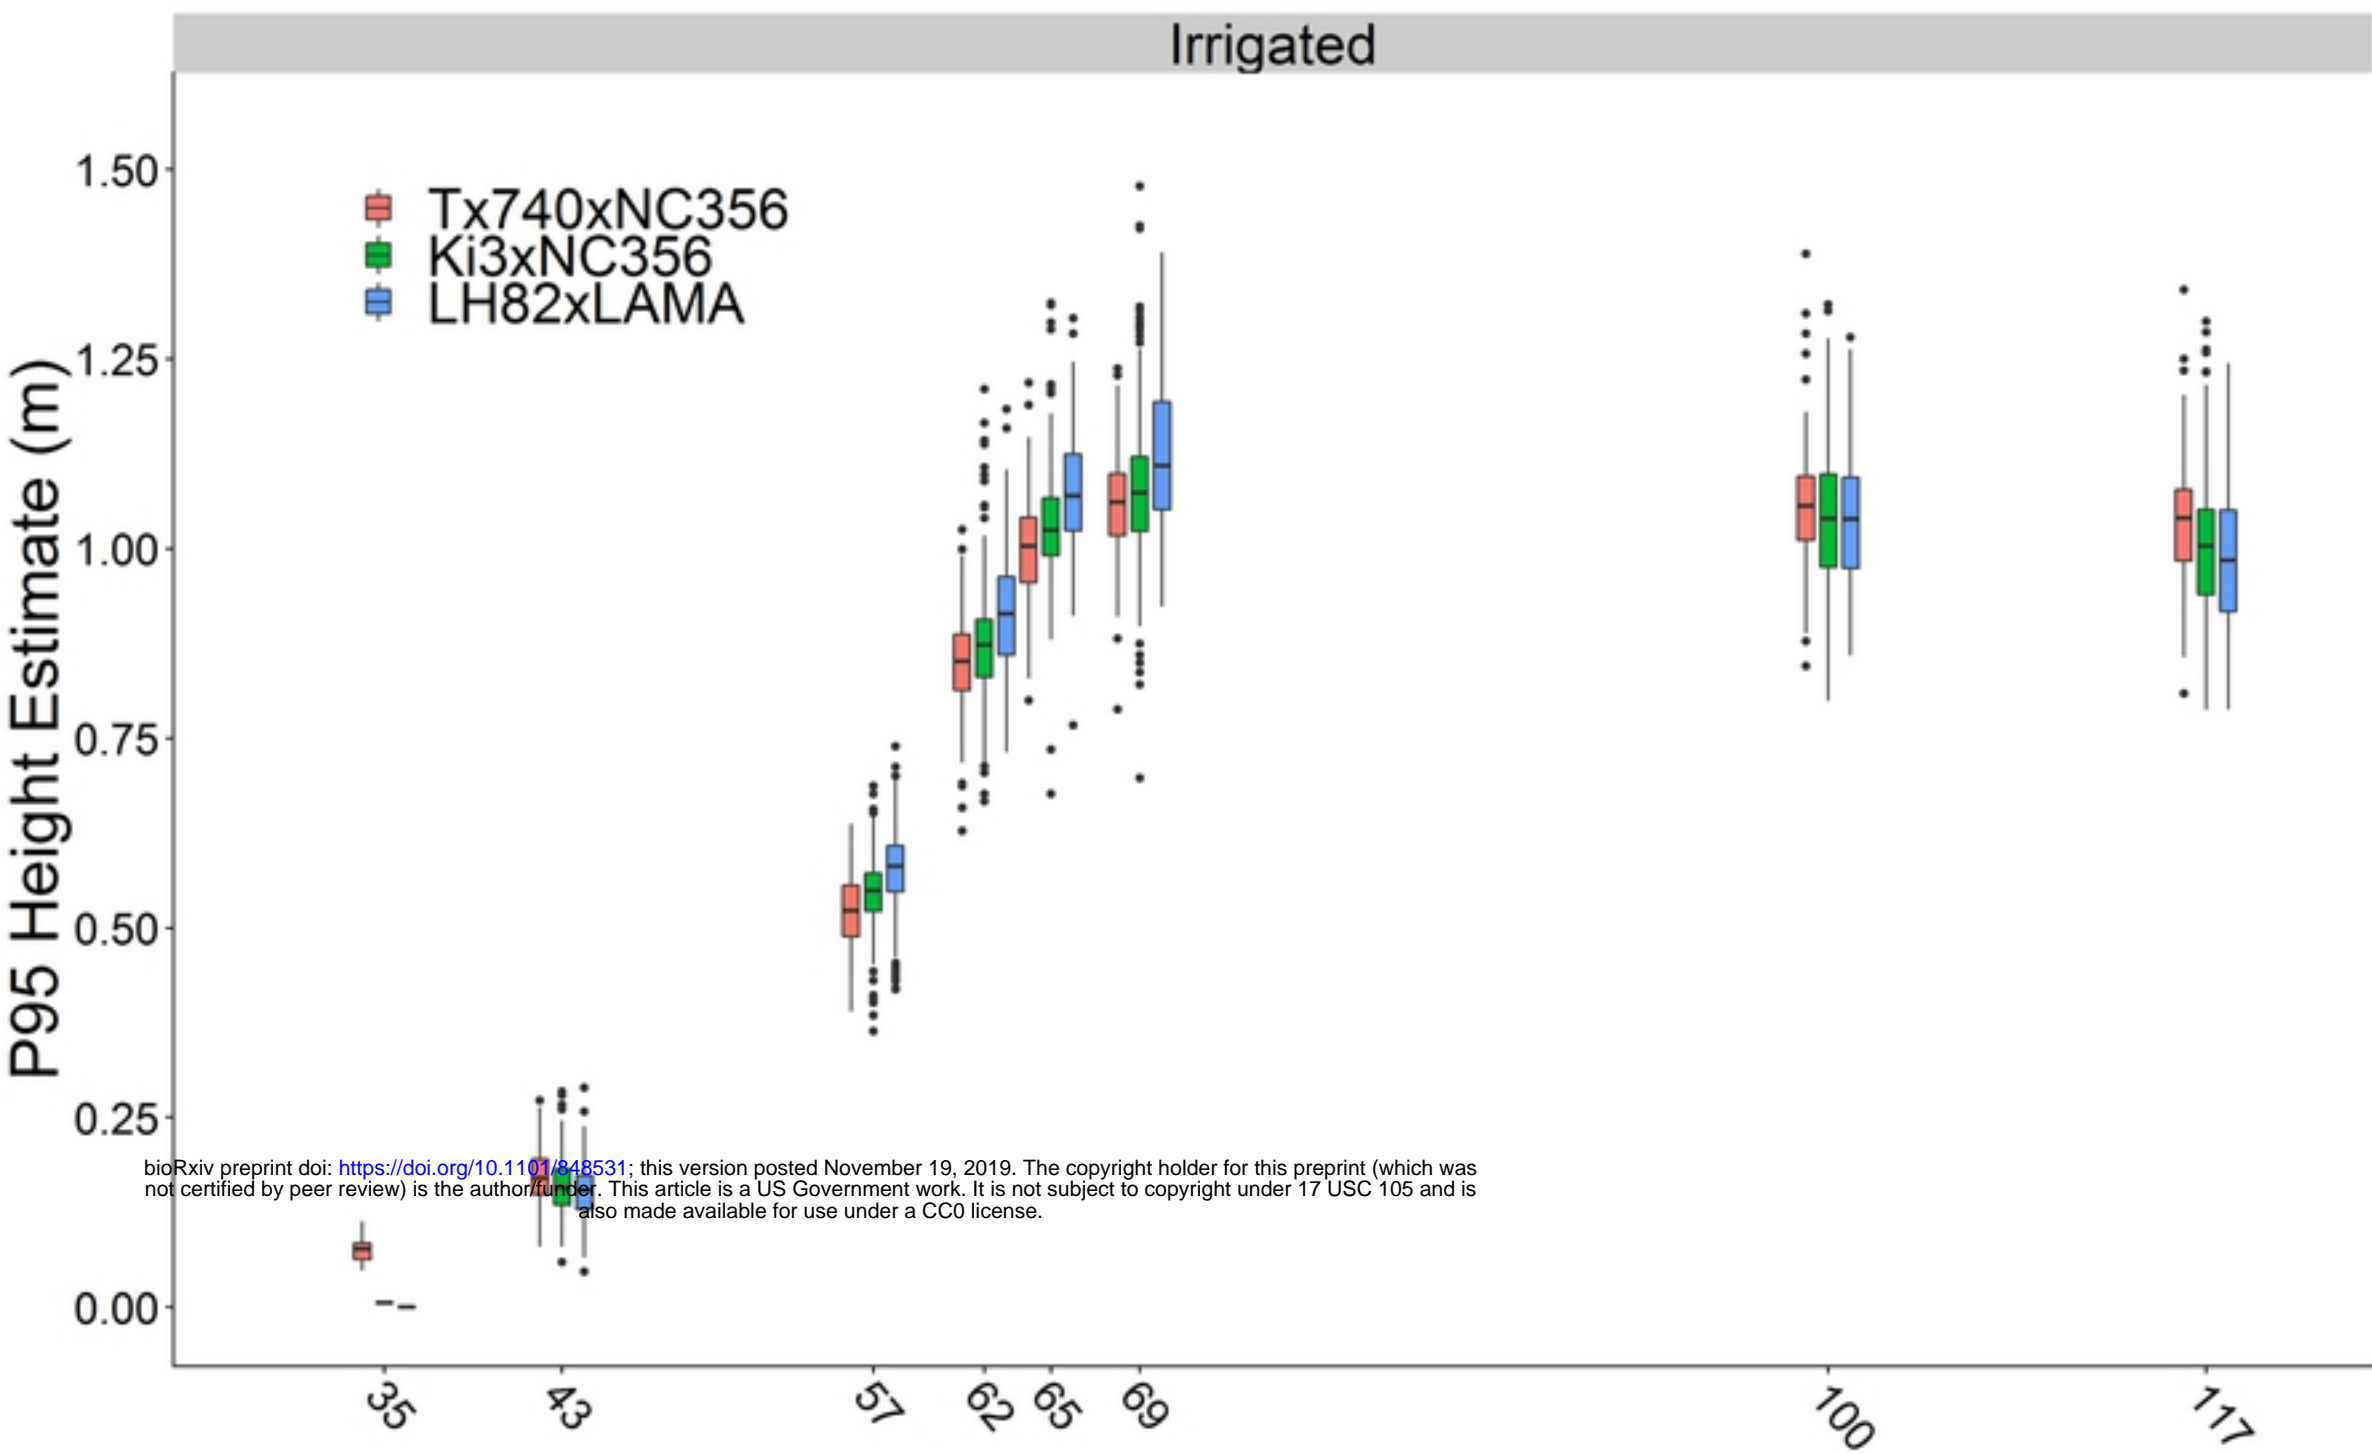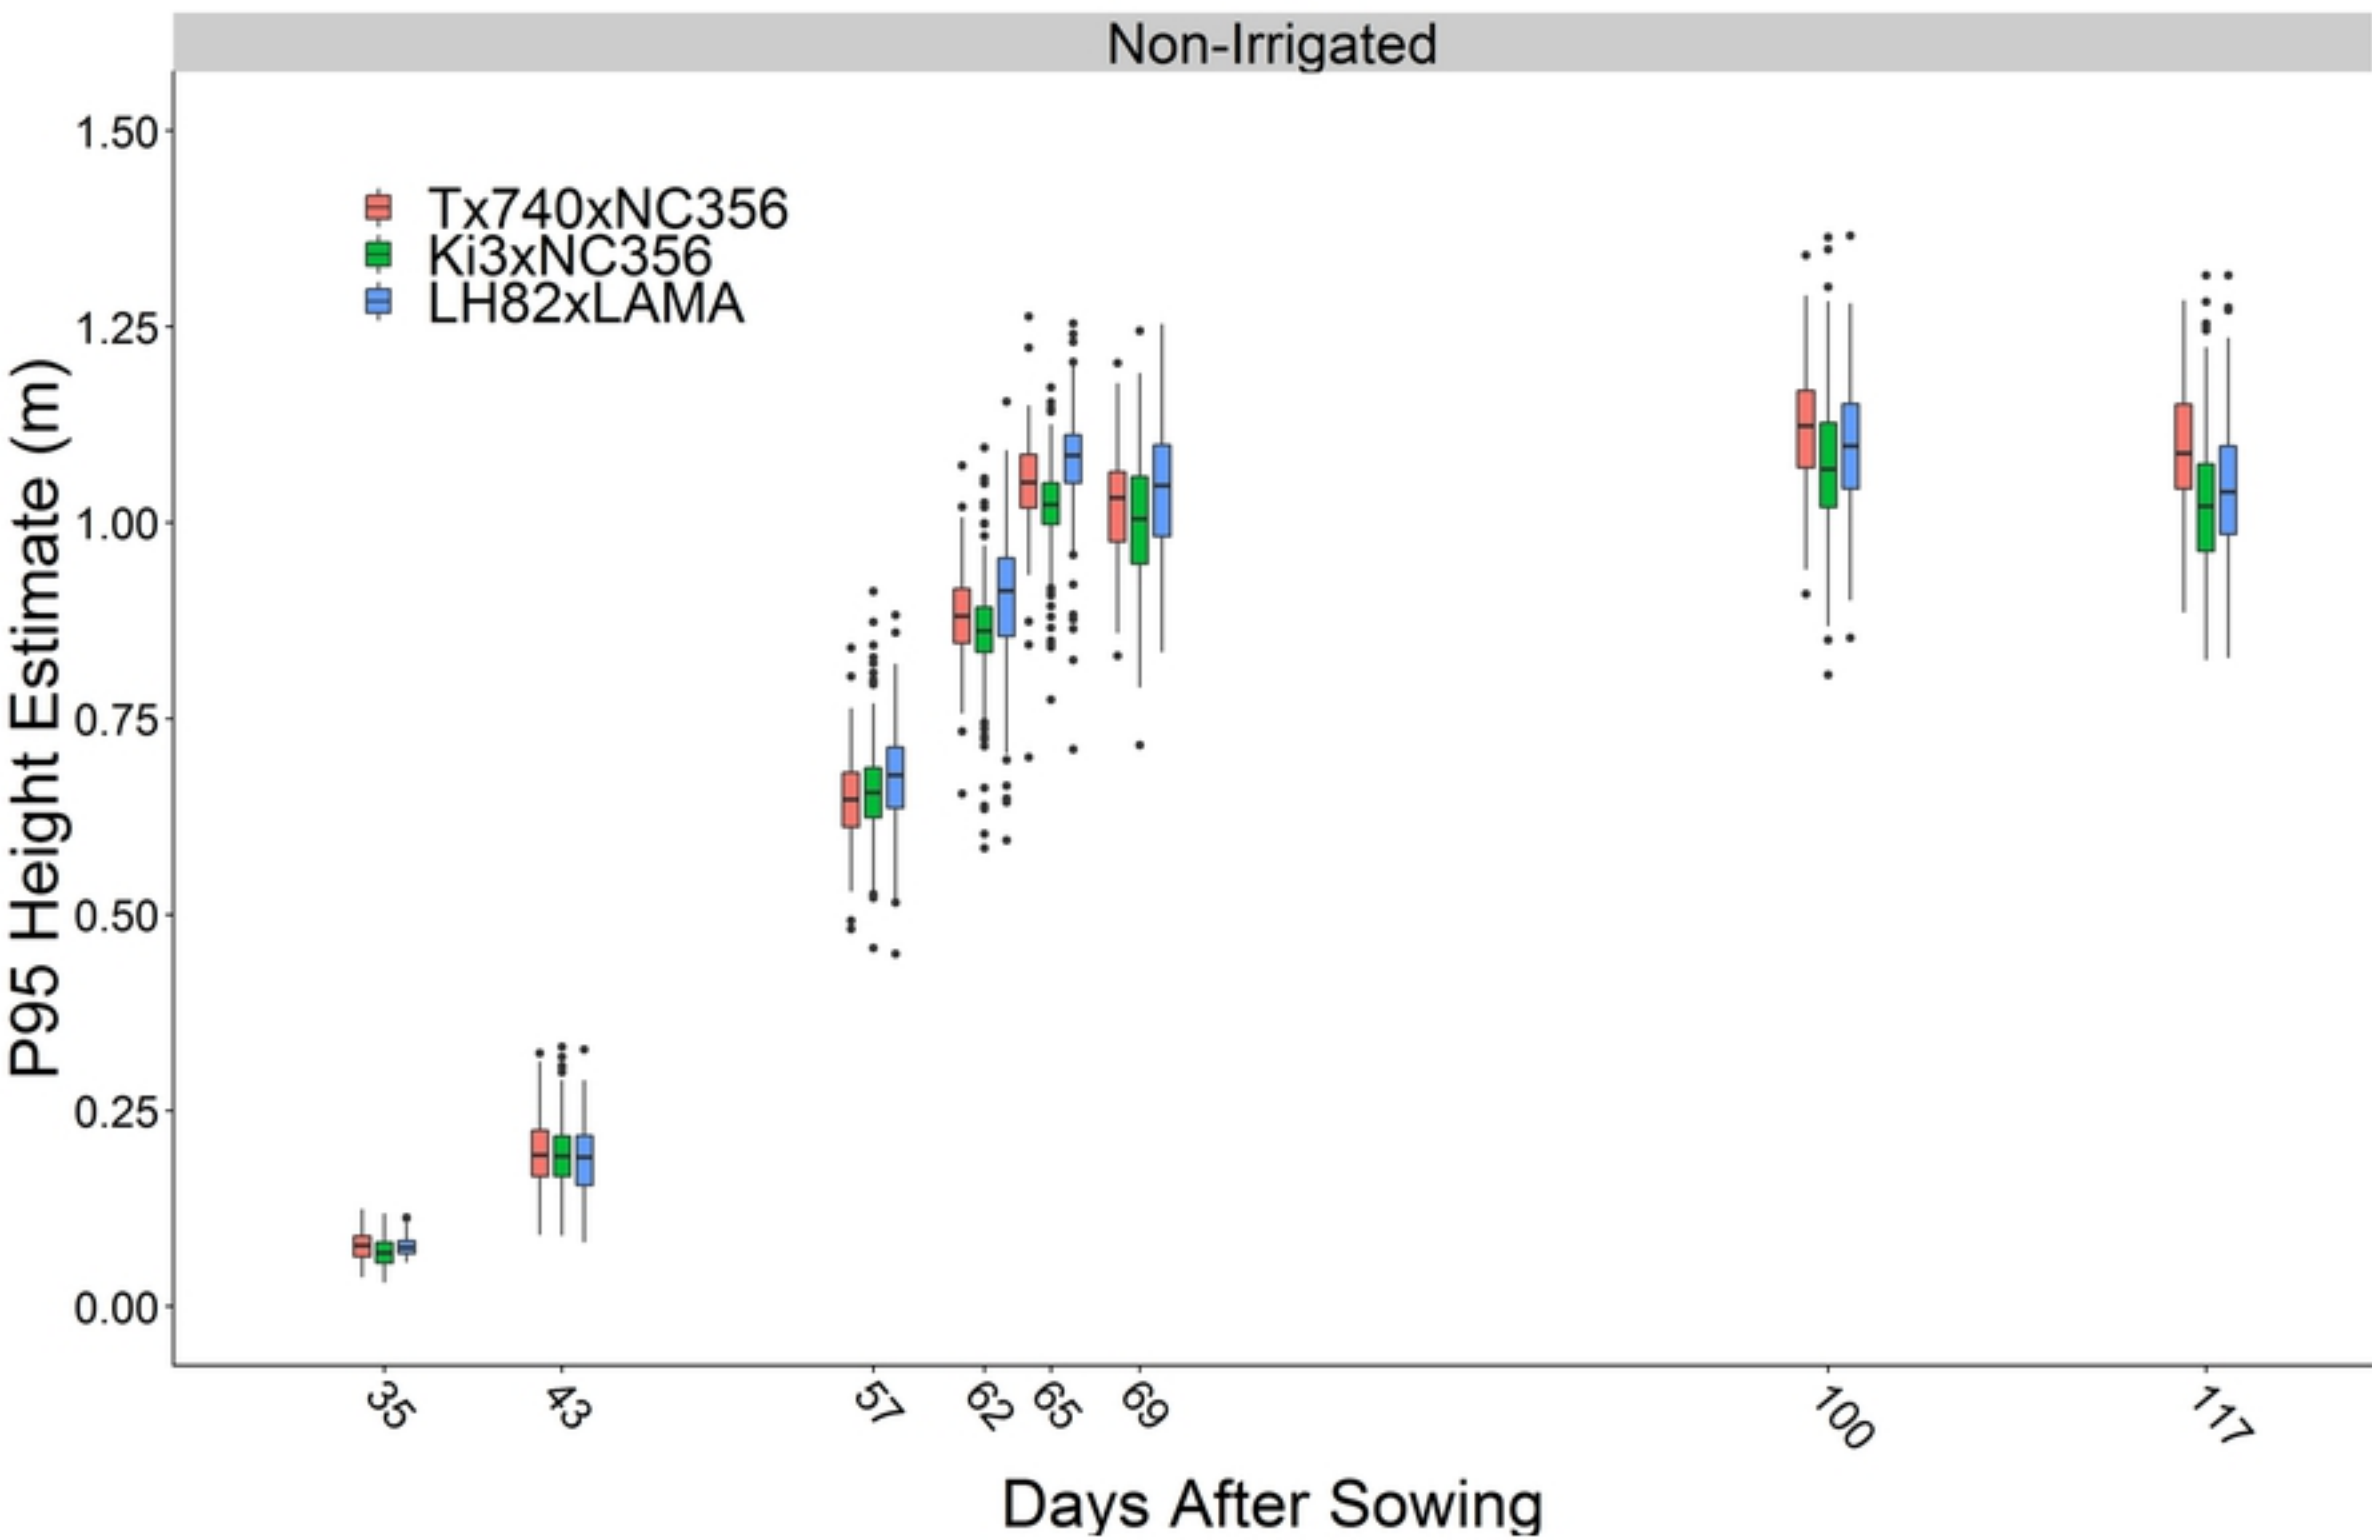

Fig 1

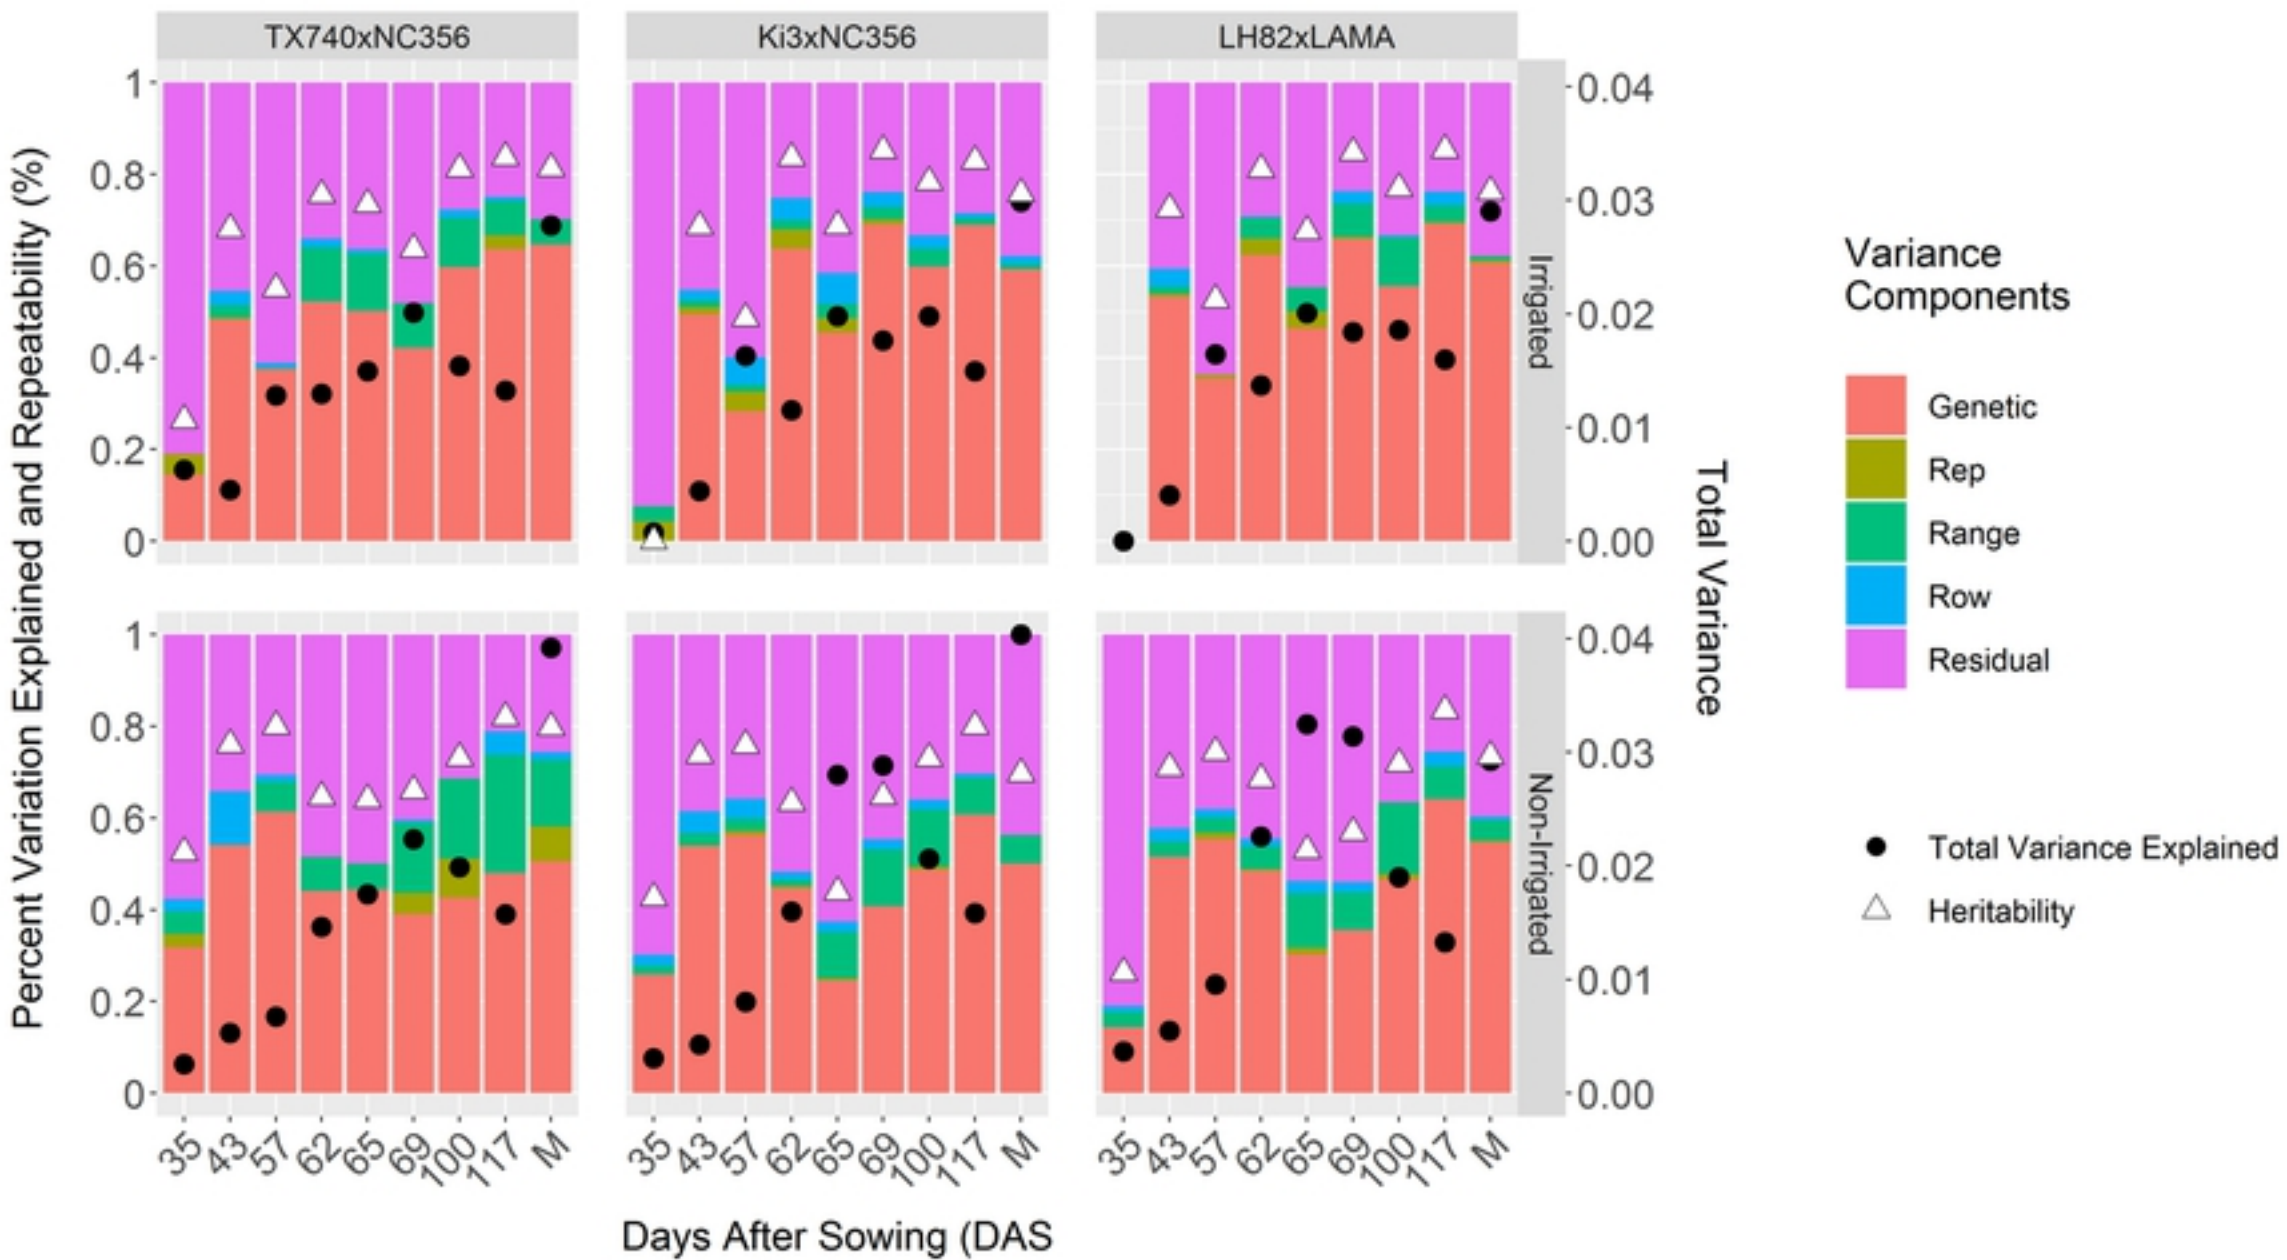

Fig 2

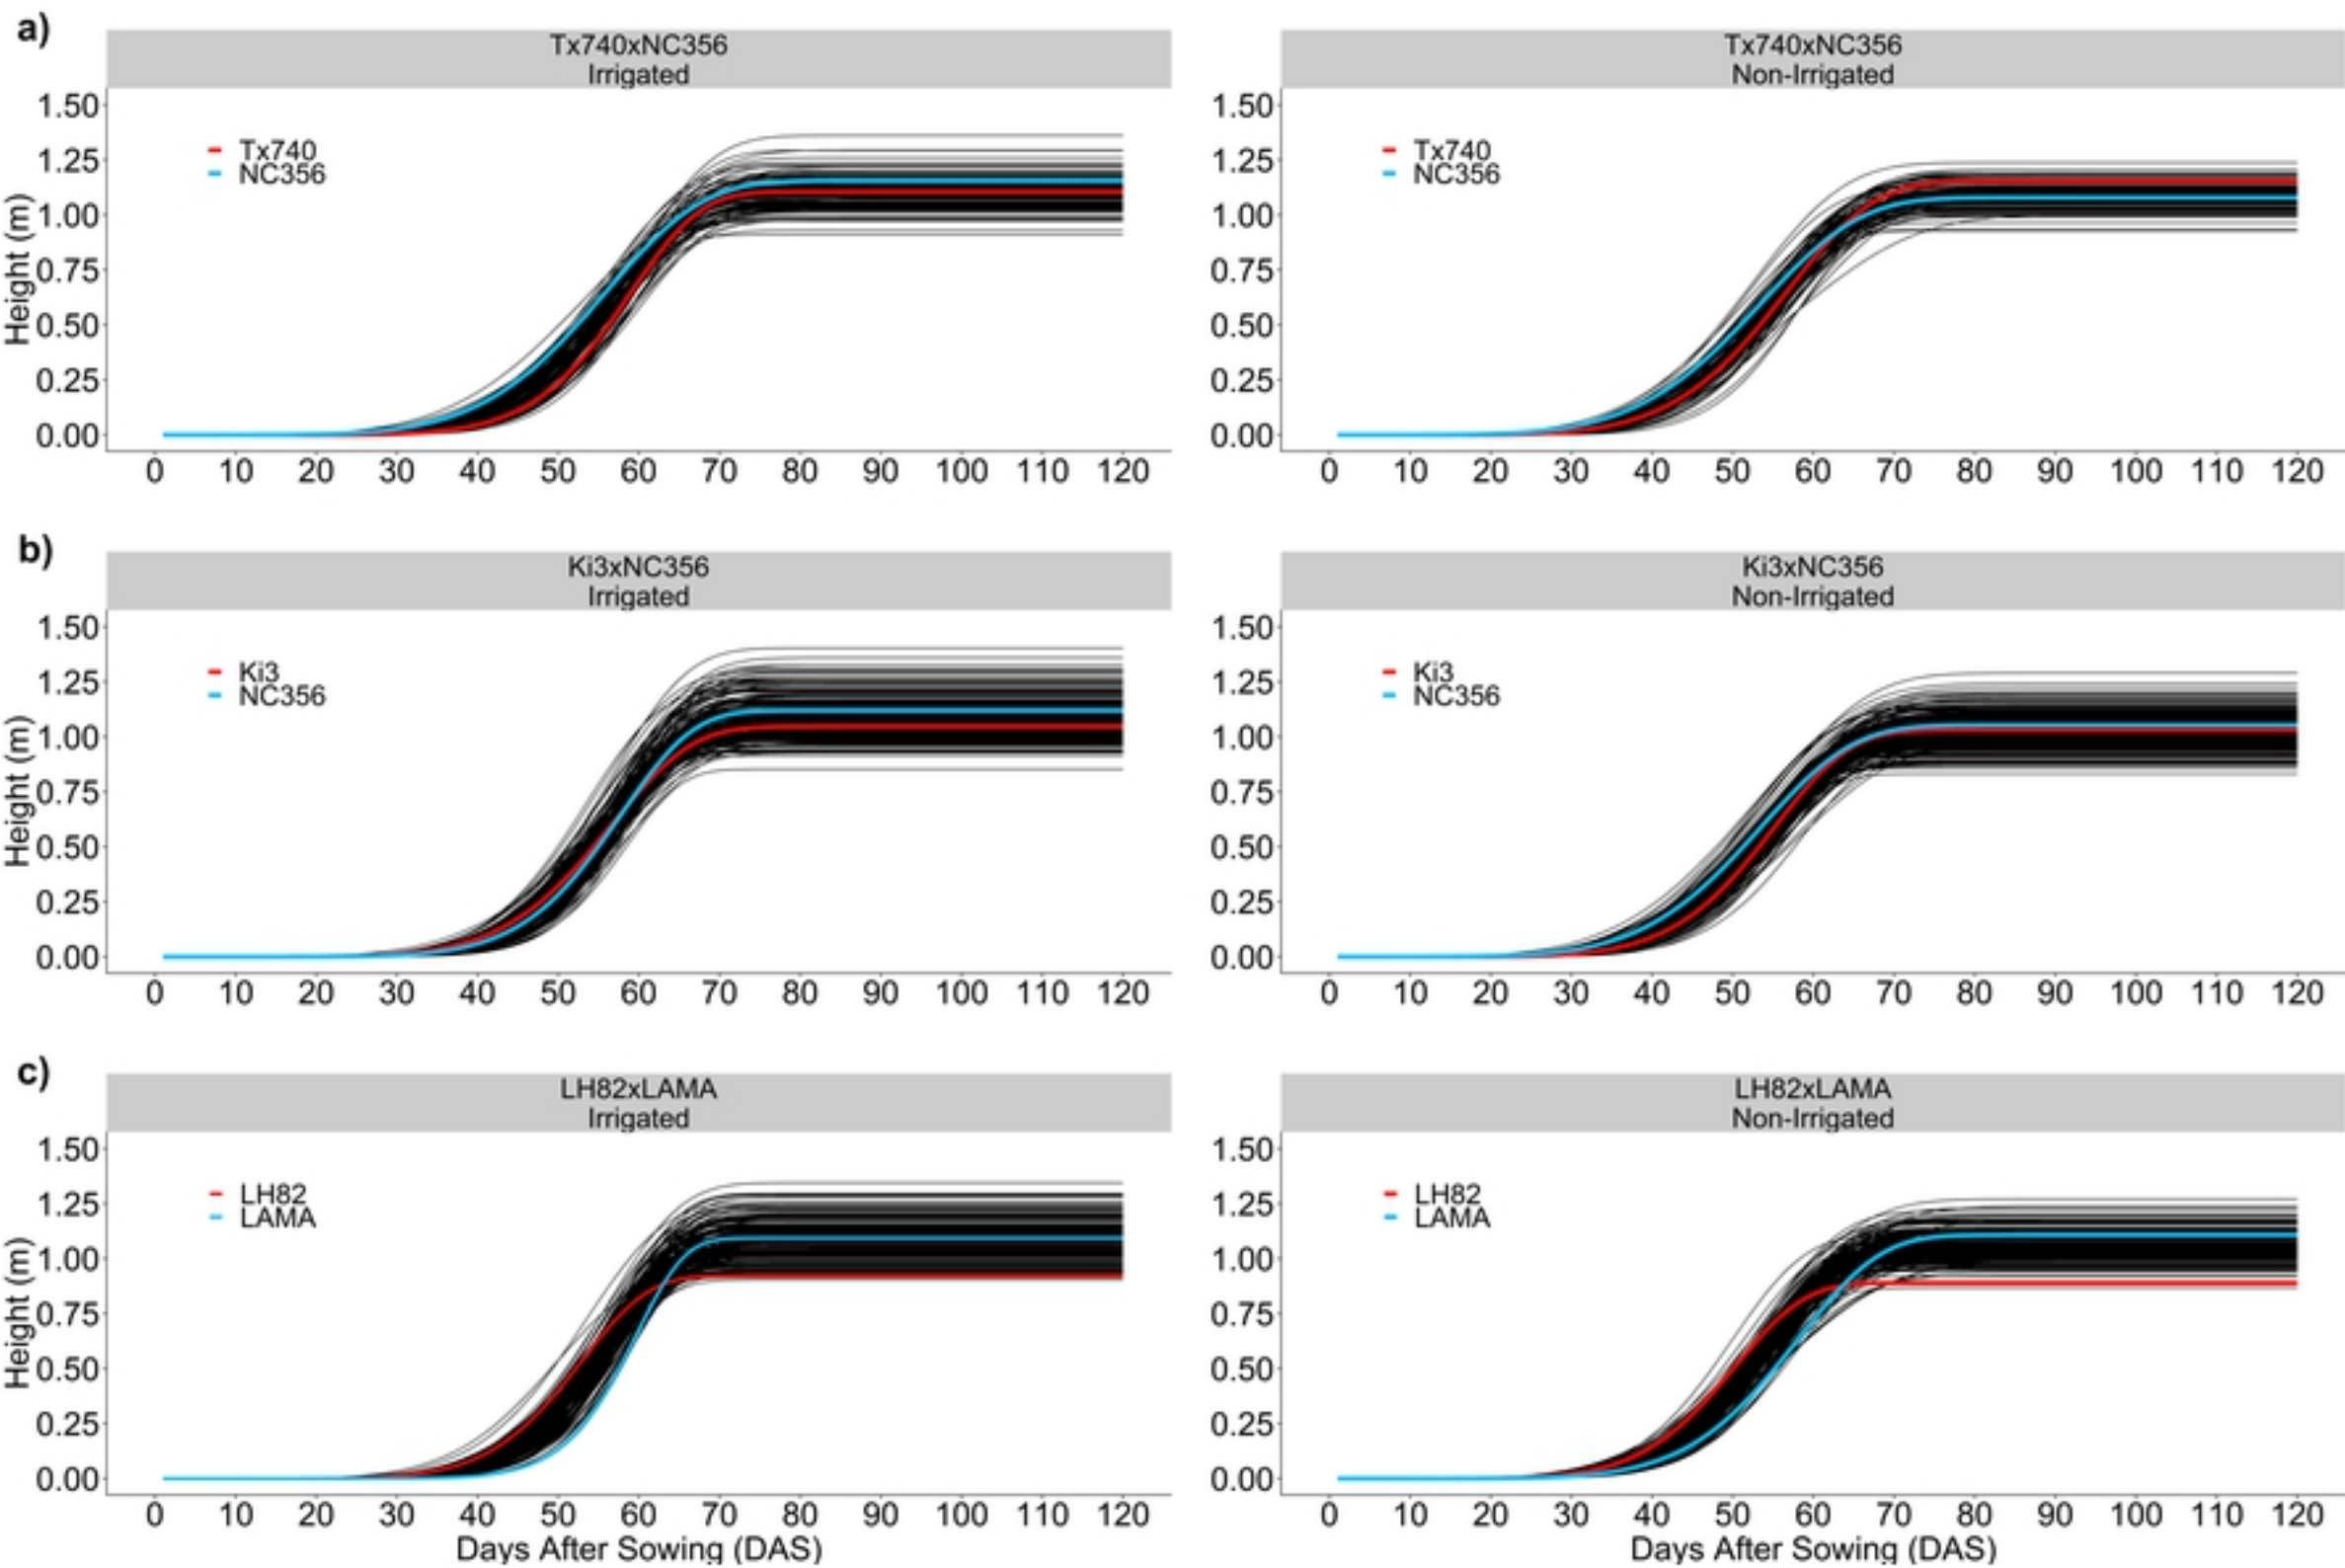

Fig 3

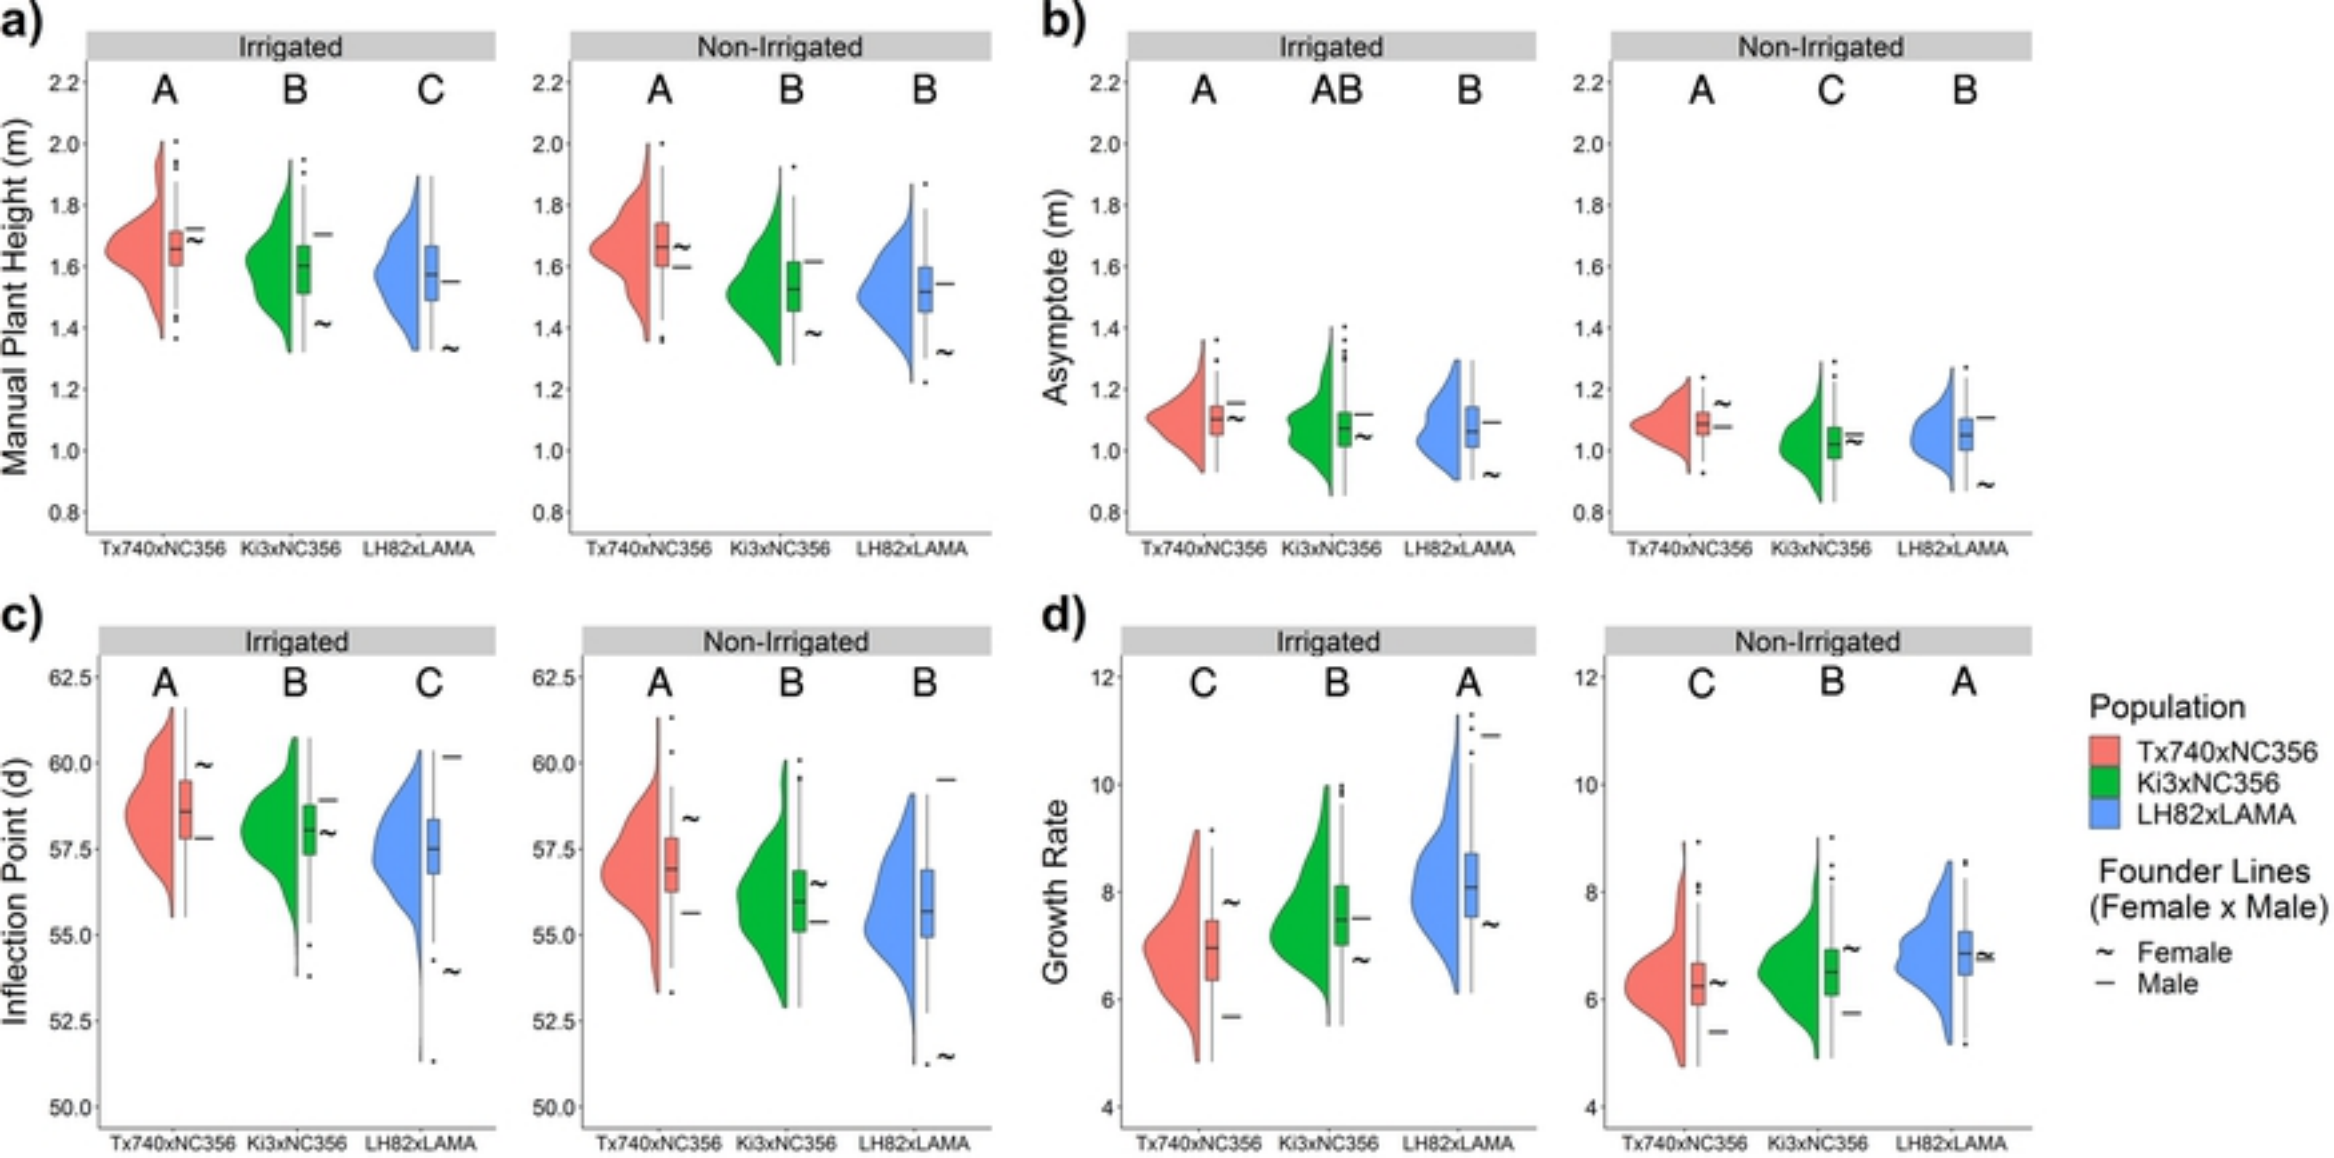

Fig 4

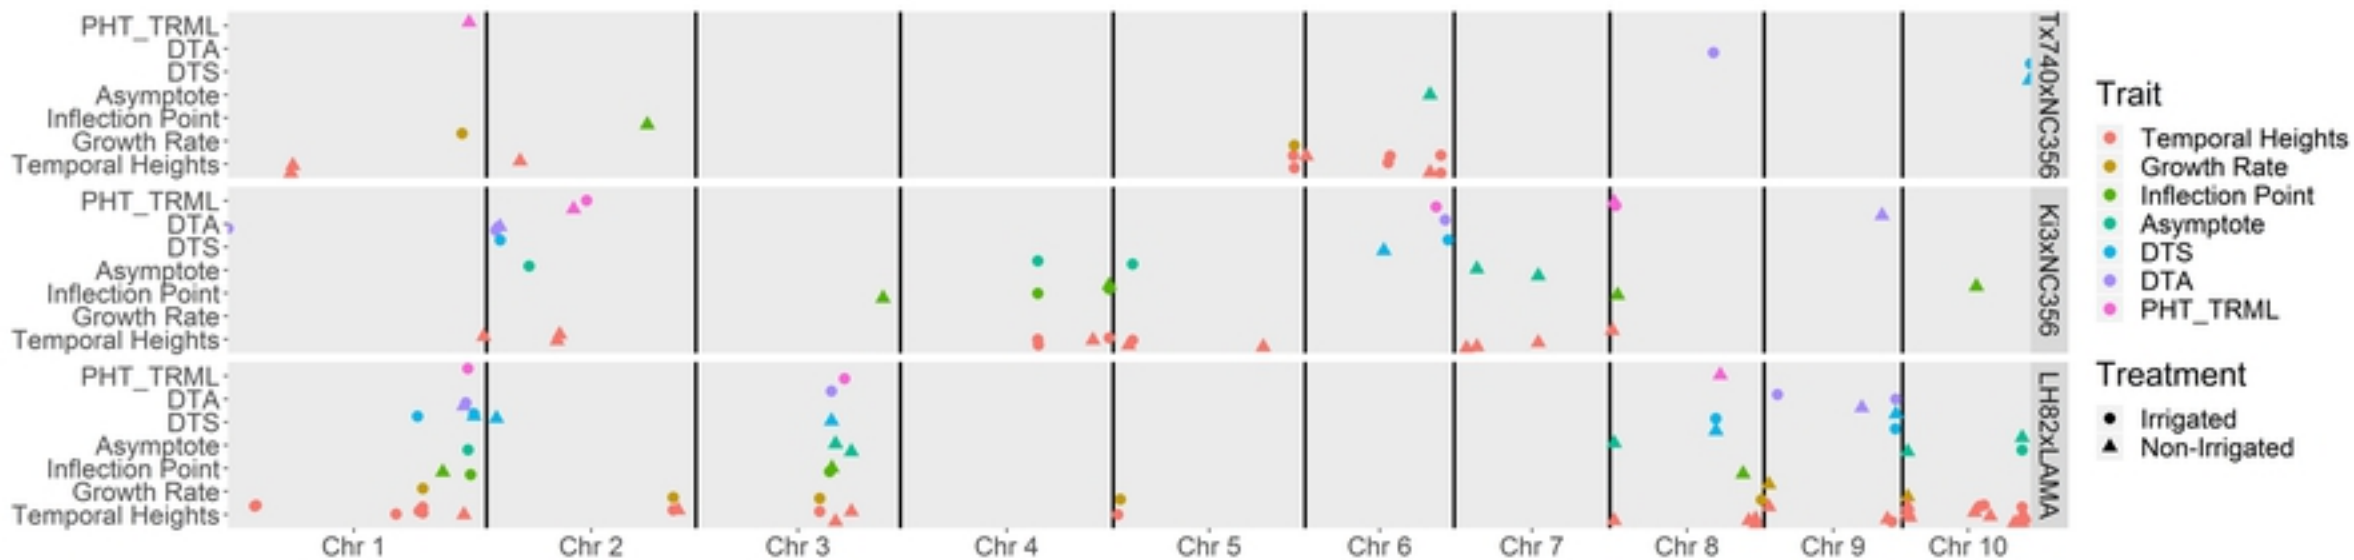

Fig 5

**a) Tx740xNC356 Irrigated**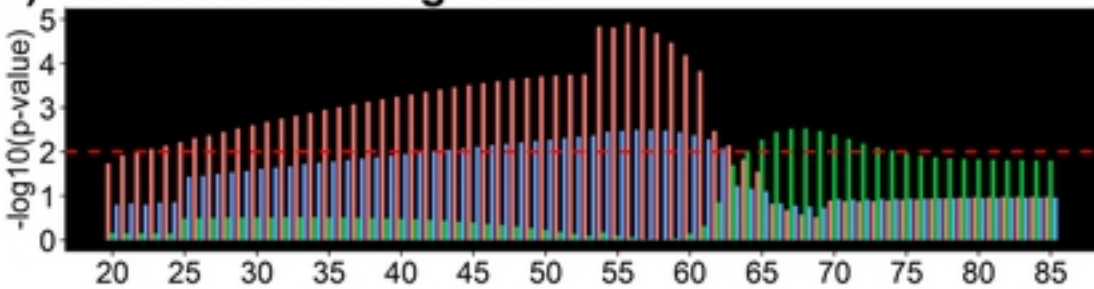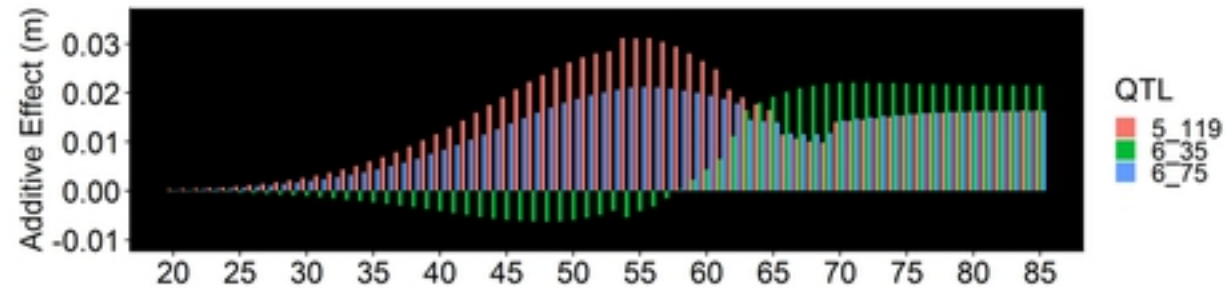**b) Tx740xNC356 Non-Irrigated**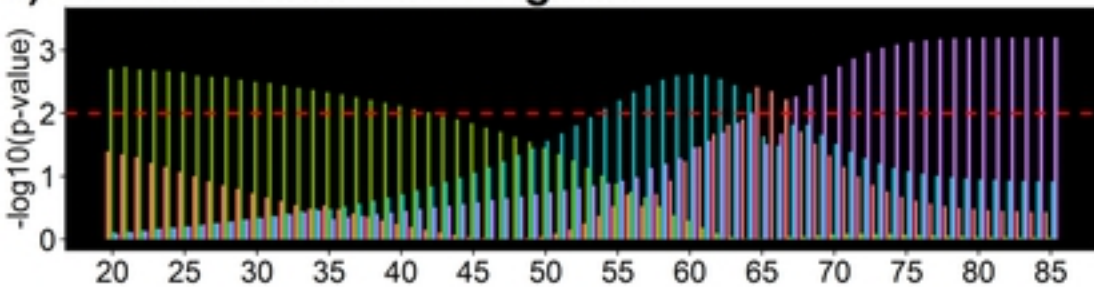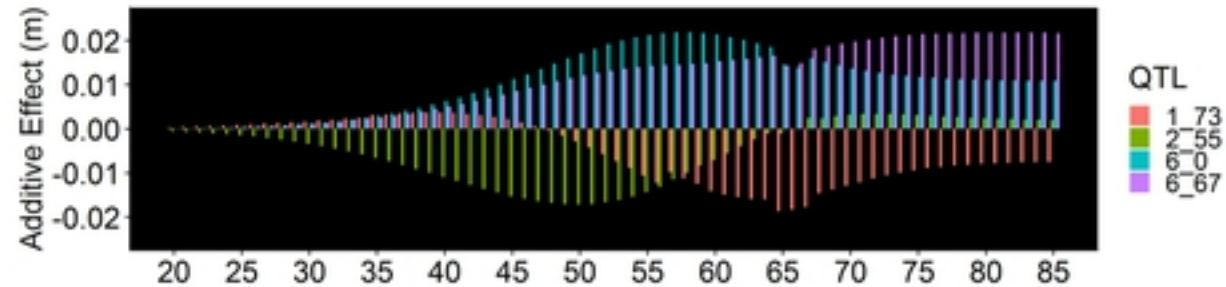**c) Ki3xNC356 Irrigated**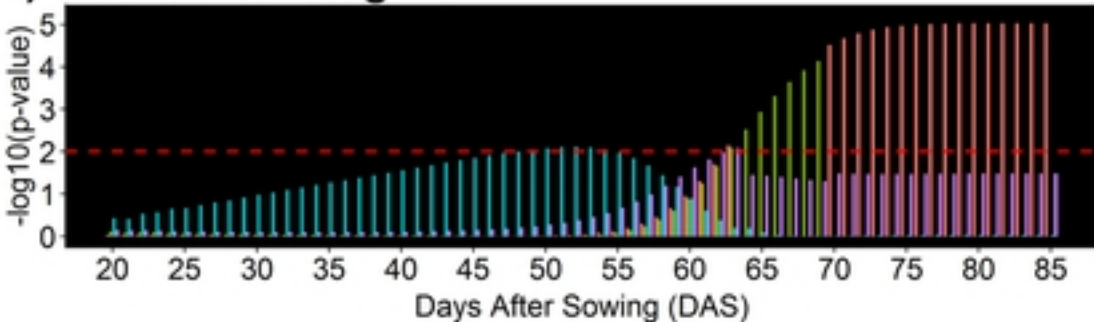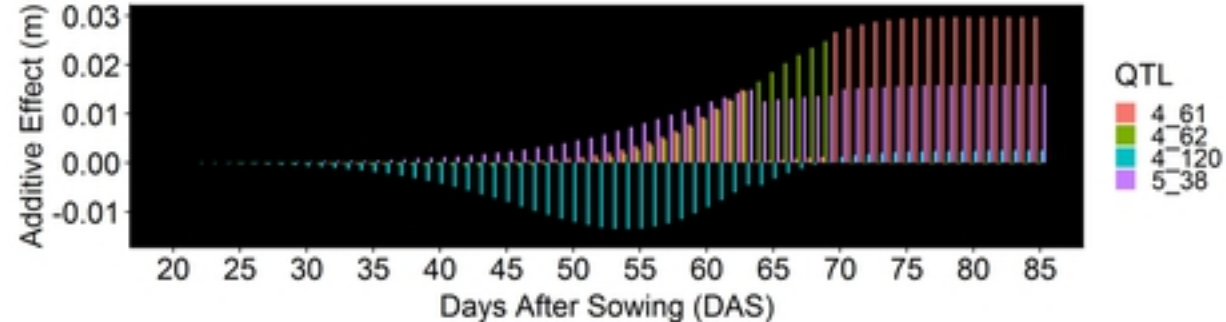**Fig 6**
